# Supplementary material for: Does Organic Farming Increase Raspberry Quality, Aroma and Beneficial Bacterial Biodiversity?
Source: MDPI journal article supplement (doi:10.3390/microorganisms9081617), 2021-07-29
Supplement: s1 [file s1]

Supplementary material

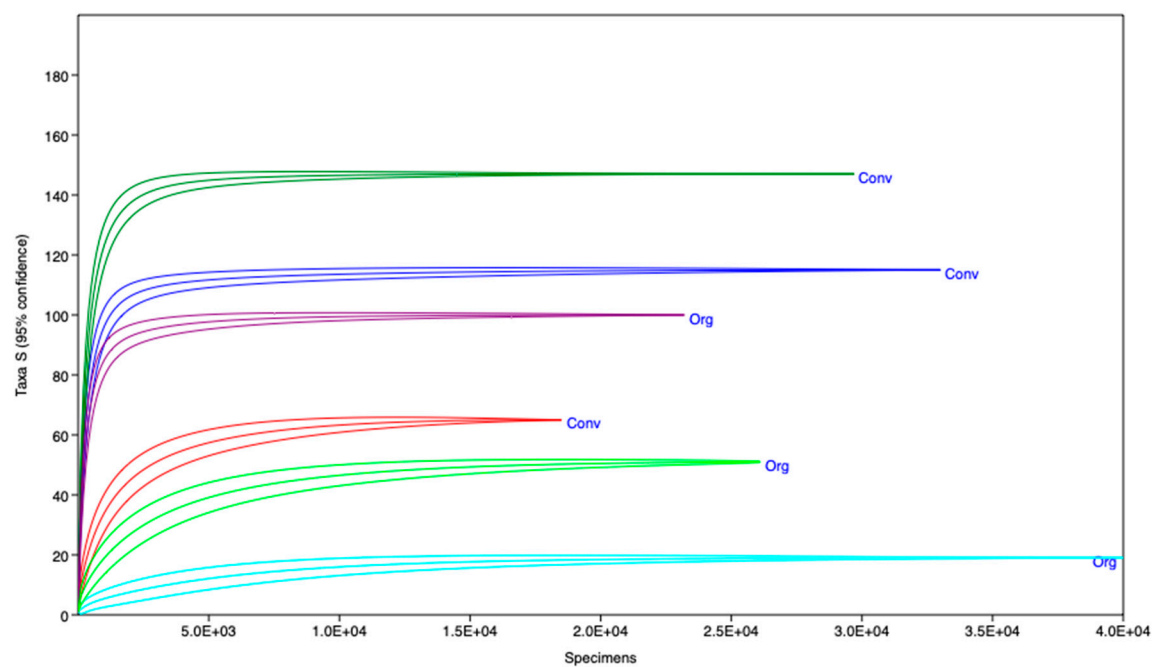

**Figure S1.** Rarefaction curves of community richness estimates of IPM (Conv) and (Organic) raspberry samples.

**Table S1.** Diversity indexes for IPM and organic raspberry samples.

|                         | <i>Organic</i> | <i>IPM</i> |
|-------------------------|----------------|------------|
| <i>Taxa (S)</i>         | 147            | 269        |
| <i>Individuals (n)</i>  | 29955          | 27216      |
| <i>Simpson (1-D)</i>    | 0.7272         | 0.9146     |
| <i>Shannon (H)</i>      | 2.008          | 3.626      |
| <i>Equitability (J)</i> | 0.4024         | 0.6481     |
| <i>Chao-1</i>           | 154.5          | 282        |

**Table S2.** Table S2: Emission (mean ± SE) and tentative identification of *m/z* fragments detected by PTR-MS analysis of raspberry juice cultures of bacterial isolates, and loadings of each *m/z* fragment on principal components 1, 2 and 3 of the PCA built on in silico fruit emissions. Nd = not detected. See attached excel file.
