# Supplementary material for: Does Organic Farming Increase Raspberry Quality, Aroma and Beneficial Bacterial Biodiversity?
Source: Microorganisms. 2021 Jul 29;9(8):1617. doi: 10.3390/microorganisms9081617 (PMC8400319; doi:10.3390/microorganisms9081617)
Supplement: Supplementary file 1 [file microorganisms-09-01617-s001.zip › Table S2.xlsx]

## Sheet: bacteial m z and identification
m/z	Formula	Tentative identification	Pseudomonas stutzeri	Ochrobactrum intermedium	Pseudomonas fluorescens - strain1	Paenibacillus alvei	Paenibacillus macerans	Pantoea rwadensis - strain1	Cellulomonas spp.	Pseudomonas fluorescens - strain2	Ochrobactrum pseudogrignonense	Sphingomonas paucimobilis- strain1	Burkholderia spp.	Erwinia aphidicola	Methylobacterium extorquens	Paenibacillus polymixa	Enterobacter asburiae	Bacillus subtilis	Erwinia toletana	Erwinia rhapontici	Lactobacillus plantarum	Enterobacter spp. - strain1	Pantoea agglomerans - strain1	Sphingomonas paucimobilis - strain2	Pantoea ananatis	Sphingomonas camponoticapiti - 24	Pantoea rwadensis - strain2	Pantoea agglomerans - strain2	Erwinia spp.	Klebsiella oxytoca	Rosenbergiella spp.	Enterobacter spp. - strain2	Enterobacter spp. - strain3	Tatumella punctata - strain2	Tatumella terrea
ms 27.024	C2H3+	Acetylene	2.79 ± 0.3	1.9 ± 0.31	0.04 ± 0.04	2.12 ± 0.25	0.06 ± 0.01	0.04 ± 0.04	1.88 ± 0.07	0.03 ± 0.02	0.06 ± 0.03	nd	nd	2.51 ± 0.19	2.97 ± 0.09	3.07 ± 0.52	0.07 ± 0.04	2.43 ± 0.1	2.31 ± 0.29	2.77 ± 0.07	0.23 ± 0.02	2.61 ± 0.45	1.92 ± 0.14	2.61 ± 0.45	0.02 ± 0.02	0.01 ± 0.01	2.19 ± 0.25	0.8 ± 0.09	0.45 ± 0.06	0.71 ± 0.02	nd	4 ± 0.92	3.19 ± 0.39	1.04 ± 0.15	0.04 ± 0.04
ms 28.018	CH2N+	Hydrogen cyanide	0.02 ± 0.01	0.01 ± 0	10.48 ± 0.94	0.04 ± 0.01	0.03 ± 0.01	2.79 ± 0.34	0.02 ± 0.01	nd	nd	0.01 ± 0.01	0.04 ± 0.03	0.02 ± 0.01	0.05 ± 0.01	0.03 ± 0.02	0.03 ± 0.01	0.32 ± 0.32	0.44 ± 0.06	0.02 ± 0	0.02 ± 0.01	0.04 ± 0.01	0.01 ± 0.01	0.01 ± 0.01	0.06 ± 0.03	0.02 ± 0.01	0.02 ± 0	0.02 ± 0.01	0.02 ± 0.02	nd	nd	0.08 ± 0.03	0.1 ± 0.01	0.02 ± 0.01	0.02 ± 0.01
ms 28.0308	C2H4+	Vynil radical	0.54 ± 0.05	0.46 ± 0.03	0.04 ± 0.04	0.28 ± 0.04	nd	0.02 ± 0.01	0.32 ± 0.04	0.01 ± 0.01	0.05 ± 0.02	0.05 ± 0.02	0.09 ± 0	0.49 ± 0.03	0.46 ± 0.03	0.27 ± 0.04	0.01 ± 0.01	0.38 ± 0.01	0.29 ± 0.08	0.34 ± 0.02	0.12 ± 0.01	0.48 ± 0.02	0.37 ± 0.05	0.24 ± 0.08	nd	0.02 ± 0.01	0.37 ± 0.06	0.5 ± 0.07	0.42 ± 0.05	0.47 ± 0.09	0.05 ± 0.03	0.46 ± 0.06	0.62 ± 0.06	0.29 ± 0	0.04 ± 0.03
ms 31.018	CH2OH+	Formaldehyde	6.73 ± 0.86	6.09 ± 0.06	nd	3.23 ± 0.76	nd	nd	4.39 ± 0.38	nd	0.18 ± 0.09	0.54 ± 0.14	0.33 ± 0.09	5.99 ± 0.58	4.79 ± 0.81	2.8 ± 0.8	nd	4.35 ± 0.05	3.18 ± 1.07	2.73 ± 0.09	0.89 ± 0.26	6.4 ± 0.15	4.58 ± 0.43	2.1 ± 1.09	nd	nd	3.87 ± 0.37	6.78 ± 0.86	5.42 ± 0.51	5.63 ± 0.89	0.65 ± 0.33	3.41 ± 0.97	6.37 ± 0.7	1.94 ± 0.1	0.75 ± 0.48
ms 31.0362			0.1 ± 0.04	0.1 ± 0.05	0.01 ± 0.01	0.08 ± 0.02	nd	0.01 ± 0.01	0.11 ± 0.02	0.01 ± 0.01	nd	nd	0.02 ± 0.02	0.09 ± 0.01	0.15 ± 0.02	0.06 ± 0.03	0.01 ± 0.01	0.07 ± 0.03	0.11 ± 0	0.14 ± 0.02	0.03 ± 0.01	0.08 ± 0.01	0.11 ± 0.04	0.11 ± 0.02	0.01 ± 0.01	0.01 ± 0.01	0.08 ± 0.04	0.04 ± 0.03	0.01 ± 0.01	0.06 ± 0.02	nd	0.14 ± 0.04	0.13 ± 0.06	0.04 ± 0.03	0.01 ± 0.01
ms 33.033	CH4OH+	methanol	nd	42.66 ± 42.66	165.25 ± 48.99	35.2 ± 35.2	110.64 ± 59.03	332.02 ± 119.81	16.09 ± 16.09	181.49 ± 56.54	261.74 ± 78.66	113.01 ± 56.89	215.22 ± 85.54	nd	32.28 ± 32.28	46.99 ± 46.99	241.77 ± 122.87	nd	nd	nd	119.55 ± 114.53	40.72 ± 40.72	nd	608.06 ± 305.81	176.45 ± 112.86	209.52 ± 92.11	nd	64.61 ± 64.61	81.41 ± 44.73	128.07 ± 128.07	63.71 ± 63.71	35.83 ± 35.83	nd	826.04 ± 134.19	338.84 ± 41.62
ms 34.9953	H2SH+	Hydrogen sulphide	7.1 ± 2.08	0.03 ± 0.02	nd	nd	nd	nd	0.01 ± 0.01	nd	0.01 ± 0.01	0.02 ± 0.02	nd	2.72 ± 0.77	0.01 ± 0	0.18 ± 0.05	nd	0.01 ± 0	0.15 ± 0.12	nd	1.13 ± 0.44	36.15 ± 16.38	0.06 ± 0.03	0.01 ± 0.01	nd	nd	0.02 ± 0.02	0.46 ± 0.46	0.02 ± 0.01	0.02 ± 0.01	0.01 ± 0.01	nd	nd	0.24 ± 0.12	0.01 ± 0.01
ms 39.023	C3H3+	common fragment	23.52 ± 2.71	23.38 ± 6.11	0.14 ± 0.14	29.15 ± 4.64	nd	0.13 ± 0.13	27.93 ± 2.35	nd	0.11 ± 0.11	0.55 ± 0.55	nd	20.11 ± 1.53	23.26 ± 0.81	25 ± 3.29	0.07 ± 0.07	39.13 ± 3.58	10.71 ± 3.25	37.86 ± 2.86	0.18 ± 0.18	20.79 ± 3.3	23.21 ± 3.63	27.88 ± 5.21	0.11 ± 0.11	nd	31.48 ± 4.98	0.38 ± 0.19	0.77 ± 0.77	nd	0.41 ± 0.36	12.42 ± 4.9	7.95 ± 1.94	1.55 ± 0.77	1.25 ± 1.25
ms 41.038	C3H5+	common fragment	236.32 ± 27.38	202.06 ± 51.41	2.23 ± 2.23	250.33 ± 38.85	1.13 ± 0.64	3.24 ± 3.24	228.94 ± 18	4.09 ± 2.13	4.15 ± 2.82	1.81 ± 1.81	nd	203.26 ± 18.69	239.61 ± 10.37	267.17 ± 41.33	8.24 ± 4.31	322.26 ± 31.73	124.75 ± 33.2	342.25 ± 26.31	6.01 ± 2.67	214.2 ± 34.64	205.25 ± 32.83	263.82 ± 48.16	1.8 ± 1.8	0.6 ± 0.6	260.24 ± 44.5	11.97 ± 2.61	5.77 ± 5.77	0.67 ± 0.67	3.19 ± 1.72	158.76 ± 49.47	110.36 ± 24.33	32.1 ± 9.4	6.9 ± 6.9
ms 42.0112			0.54 ± 0.03	0.48 ± 0.04	nd	0.34 ± 0.06	nd	nd	0.4 ± 0.03	nd	0.04 ± 0.01	0.02 ± 0.01	0.01 ± 0.01	0.5 ± 0.06	0.45 ± 0.05	0.35 ± 0.09	0.01 ± 0.01	0.39 ± 0.02	0.42 ± 0.08	0.42 ± 0.05	0.08 ± 0.04	0.46 ± 0.06	0.45 ± 0.02	0.38 ± 0.05	nd	nd	0.39 ± 0.01	0.29 ± 0.09	0.28 ± 0.03	0.48 ± 0.07	0.06 ± 0.01	0.64 ± 0.22	0.45 ± 0.08	0.5 ± 0.03	0.06 ± 0.04
ms 43.017	C2H3O+	common fragment	1376.82 ± 270.98	568.73 ± 188.91	nd	1100.3 ± 210.61	30.19 ± 16.49	nd	1128.08 ± 105.32	2.4 ± 2.4	42.98 ± 42.98	nd	nd	1264.36 ± 122.61	1620.35 ± 157.32	1475.07 ± 406.7	49.51 ± 10.73	858.01 ± 92.76	1178.58 ± 265.82	1519.76 ± 143.91	133.65 ± 25.47	1297.77 ± 211.51	564.74 ± 113.81	1414.93 ± 376.6	2.6 ± 2.6	nd	1207.72 ± 288.86	134 ± 34.36	157.63 ± 41.31	205.1 ± 62.67	79.77 ± 42.82	2284.96 ± 780.08	1520.35 ± 414.45	3100.9 ± 268.92	34.72 ± 22.63
ms 43.054	C3H7+	common fragment	293.22 ± 39.61	153.08 ± 32.18	4 ± 3.26	220.42 ± 33.83	14.62 ± 1.06	4.99 ± 4.02	204.07 ± 12.48	8.76 ± 2.72	9.41 ± 4.94	nd	0.28 ± 0.28	257.67 ± 24.92	339.97 ± 14.14	367.69 ± 66.84	15.48 ± 3.19	256.36 ± 15.52	192.44 ± 38.09	305.55 ± 19.77	16.56 ± 2.93	283.59 ± 48.88	156.72 ± 16.17	309.06 ± 72.98	4.53 ± 3.29	5.45 ± 1.07	229.5 ± 36.85	26.64 ± 3.75	8.96 ± 5.63	7.59 ± 0.65	nd	346.99 ± 114.09	234.61 ± 47.53	71.34 ± 18.97	3.57 ± 3.57
ms 45.033	C2H4OH+	Acetaldehyde	636.39 ± 121.79	727.88 ± 194.87	nd	nd	nd	nd	nd	nd	nd	64.45 ± 15.69	nd	514.46 ± 84.24	688.59 ± 106.74	398.56 ± 182.19	nd	nd	1730.5 ± 263.51	nd	nd	685.83 ± 219.22	994.44 ± 225.94	nd	nd	nd	nd	525.52 ± 159.07	563.52 ± 66.9	3120.88 ± 470.74	40.3 ± 20.2	2194.94 ± 271.64	2156.31 ± 316.16	1206.18 ± 503.61	93.58 ± 50.58
ms 47.0491	C2H6OH+	Ethanol	2758.24 ± 165.37	2839.82 ± 157.29	14.79 ± 7.4	1989.95 ± 76.51	nd	10.14 ± 5.6	1681.27 ± 126.91	2.13 ± 2.13	45.55 ± 4.78	36.07 ± 2.72	52.17 ± 5.62	2423.79 ± 199.17	2415.79 ± 162.5	2198.35 ± 208.14	8.3 ± 5.47	2002.23 ± 81.26	3449.47 ± 241.34	2648.36 ± 282.15	391.89 ± 26.78	2402.67 ± 267.55	2934.05 ± 393.05	2545.93 ± 186.86	0.03 ± 0.03	28.31 ± 3.92	1972.44 ± 126.69	2151.28 ± 211.36	1251.45 ± 38.13	2190.71 ± 298.06	47.81 ± 6.45	8021.91 ± 1468.1	6589.59 ± 339.06	2241.2 ± 147.27	58.78 ± 12.25
ms 49.0107	CH4SH+	Methanethiol	29.66 ± 4	33.88 ± 5.47	0.33 ± 0.33	17.05 ± 2.64	4.96 ± 1.19	8.4 ± 1.25	13.83 ± 1.1	0.12 ± 0.12	0.23 ± 0.23	0.05 ± 0.05	nd	35.44 ± 3.78	28.65 ± 2.95	62.58 ± 5.36	0.09 ± 0.07	15.88 ± 1.54	24.56 ± 5.94	15.99 ± 2.29	36.46 ± 1.62	50.66 ± 1.61	31.88 ± 5.36	7.35 ± 4.68	nd	4.07 ± 0.5	15.46 ± 2.21	16.47 ± 0.73	26.17 ± 0.58	15.21 ± 5.21	0.12 ± 0.06	24.89 ± 18.19	15.47 ± 2.62	37.72 ± 7.9	0.27 ± 0.25
ms 53.0043			0.23 ± 0.02	0.21 ± 0.07	nd	0.18 ± 0.06	nd	nd	0.21 ± 0.03	nd	nd	0.01 ± 0.01	nd	0.22 ± 0.03	0.23 ± 0.02	0.18 ± 0.04	nd	0.23 ± 0.01	0.12 ± 0.01	0.26 ± 0.04	0.01 ± 0.01	0.24 ± 0.02	0.2 ± 0.02	0.16 ± 0.04	nd	nd	0.2 ± 0.03	0.03 ± 0.01	0.03 ± 0.01	0.01 ± 0.01	0.01 ± 0.01	0.2 ± 0.06	0.15 ± 0.03	0.02 ± 0.01	0.02 ± 0.02
ms 53.048			1.76 ± 0.43	0.96 ± 0.41	0.07 ± 0.03	1.73 ± 0.46	nd	0.13 ± 0.03	1.65 ± 0.16	0.08 ± 0.04	0.04 ± 0.04	0.09 ± 0.09	0.02 ± 0.02	1.69 ± 0.2	2.13 ± 0.32	2.09 ± 0.61	0.08 ± 0.08	1.25 ± 0.03	1.53 ± 0.43	2.27 ± 0.22	0.2 ± 0.11	1.5 ± 0.28	1.08 ± 0.25	2.45 ± 0.67	0.08 ± 0.08	0.03 ± 0.03	1.9 ± 0.36	nd	0.12 ± 0.05	0.04 ± 0.04	0.09 ± 0.05	2.78 ± 1.03	1.69 ± 0.66	0.61 ± 0.25	0.2 ± 0.2
ms 57.034	C3H4OH+	common fragment	0.39 ± 0.22	0.88 ± 0.88	nd	0.73 ± 0.35	nd	nd	0.31 ± 0.23	nd	0.49 ± 0.49	0.72 ± 0.45	nd	0.03 ± 0.02	0.22 ± 0.11	0.69 ± 0.45	nd	0.95 ± 0.33	0.18 ± 0.18	2.25 ± 0.31	nd	0.12 ± 0.12	0.94 ± 0.6	1.38 ± 0.89	nd	nd	0.67 ± 0.5	nd	nd	nd	0.16 ± 0.11	1.42 ± 1.06	0.39 ± 0.33	nd	1 ± 0.53
ms 57.07	C4H9+	Butanol	416.07 ± 75.04	645.77 ± 202.61	12.76 ± 8.83	645.61 ± 107.3	nd	15.92 ± 6.38	528.66 ± 78.42	15.17 ± 7.08	11.4 ± 10.03	2.44 ± 2.44	4.46 ± 3.29	343.86 ± 57.91	268.9 ± 48.52	395.41 ± 70.94	25.09 ± 8.98	827.39 ± 120.26	132.73 ± 61.8	953.27 ± 101.24	8.72 ± 3.05	308.94 ± 77.33	651.33 ± 150.53	583.5 ± 128.21	7.94 ± 6.79	3.6 ± 3.6	633.27 ± 131.55	1.99 ± 1.02	17.29 ± 7.77	4.61 ± 2.51	5.29 ± 2.76	19.34 ± 4.45	19.09 ± 6.27	26.57 ± 3.12	7.18 ± 7.18
ms 59.049	C3H6OH+	Acetone, propanal	31.78 ± 6.95	82.97 ± 27.85	50.26 ± 10.79	58.1 ± 33.82	nd	56.24 ± 13.39	46.57 ± 23.56	45.98 ± 14.1	66.65 ± 8.49	51.36 ± 11.08	66.84 ± 11.16	20.43 ± 20.43	18.46 ± 16.14	73.8 ± 31.13	43.87 ± 24.75	41.36 ± 18.04	69.37 ± 9.18	71.2 ± 14.07	55.72 ± 17.72	61.36 ± 34.41	84.1 ± 6.89	74.23 ± 7.95	61.16 ± 20.55	62.09 ± 17.98	60.15 ± 10.99	69.06 ± 35.65	84.77 ± 5.95	48.26 ± 26.96	35.43 ± 17.78	88.76 ± 32.77	106.16 ± 29.83	76.79 ± 26.2	70.35 ± 34.63
ms 61.029	C2H4O2H+	Acetic acid	25.23 ± 12.64	nd	nd	nd	22.18 ± 5.7	nd	nd	nd	nd	nd	nd	47.86 ± 19.25	26.41 ± 2.96	138.02 ± 5.63	70.21 ± 8.43	1.31 ± 1.31	nd	nd	91.33 ± 24.57	117.37 ± 32.94	49.29 ± 20.82	7.09 ± 6.47	nd	nd	nd	174.89 ± 54.79	319.33 ± 68.92	333 ± 61.72	199.6 ± 68.81	82.61 ± 32.51	82.07 ± 8.49	5792.57 ± 192	52.46 ± 41.68
ms 62.0216			1.49 ± 1.49	1.8 ± 1.8	3.49 ± 2.32	4.18 ± 4.18	nd	5.95 ± 3.1	2.89 ± 2.89	4.91 ± 2.46	9.31 ± 4.5	7.2 ± 5.2	12.58 ± 2.15	7.79 ± 4.83	4.64 ± 2.27	14.6 ± 3.76	19.2 ± 2.73	nd	2.75 ± 2.75	4.86 ± 2.46	7.28 ± 3.13	7.9 ± 1.45	1.92 ± 1.77	3.03 ± 3.03	3.05 ± 2.24	4.43 ± 3.42	5.54 ± 2.94	5.47 ± 2.74	30.52 ± 0.87	13.62 ± 7.72	10.04 ± 4.18	2.75 ± 2.75	7.17 ± 5.61	75.54 ± 1.81	7.64 ± 7.64
ms 63.027	C2H6SH+	Dimethyl sulphide, ethanethiol	814.81 ± 591.75	1664.62 ± 500.99	1756.69 ± 699.23	2147.32 ± 966.66	109.92 ± 109.92	2185.11 ± 723.13	1295.65 ± 965.96	1828.91 ± 922.04	1547.49 ± 746.08	1038.32 ± 799.84	2051.47 ± 376.02	2627.56 ± 1033.28	2338.26 ± 539.77	4526.82 ± 706.1	1607.95 ± 116.07	434.06 ± 246.1	1720.2 ± 867.25	2690.8 ± 883.31	1666.71 ± 757.41	2397.17 ± 214.76	1444 ± 757.53	1106.31 ± 1106.31	1810.7 ± 587.2	1278.72 ± 880.51	2158.38 ± 1107.67	1327.47 ± 616.32	5243.87 ± 96.16	2633.73 ± 1443.83	1107.79 ± 617.67	2106.9 ± 1582.29	3345.65 ± 1674.29	1363.14 ± 11.38	983.51 ± 983.51
ms 67.0219			0.14 ± 0.1	0.31 ± 0.11	0.32 ± 0.11	0.37 ± 0.16	nd	0.4 ± 0.16	0.23 ± 0.19	0.32 ± 0.18	0.26 ± 0.15	0.16 ± 0.15	0.33 ± 0.08	0.44 ± 0.2	0.46 ± 0.16	0.83 ± 0.14	0.28 ± 0.04	0.06 ± 0.04	0.29 ± 0.16	0.45 ± 0.16	0.28 ± 0.14	0.47 ± 0.05	0.21 ± 0.11	0.19 ± 0.19	0.29 ± 0.09	0.25 ± 0.16	0.37 ± 0.2	0.21 ± 0.12	0.95 ± 0.06	0.49 ± 0.28	0.17 ± 0.1	0.36 ± 0.31	0.56 ± 0.3	0.22 ± 0.02	0.16 ± 0.16
ms 67.0587			0.68 ± 0.1	0.86 ± 0.25	0.17 ± 0.12	0.75 ± 0.36	nd	0.27 ± 0.12	0.39 ± 0.3	0.21 ± 0.11	0.14 ± 0.14	0.25 ± 0.25	0.16 ± 0.11	0.84 ± 0.28	0.74 ± 0.13	1.38 ± 0.27	0.09 ± 0.06	0.28 ± 0.19	1.22 ± 0.25	1.08 ± 0.39	0.27 ± 0.14	0.58 ± 0.17	1.02 ± 0.27	0.98 ± 0.19	0.1 ± 0.1	0.08 ± 0.08	0.74 ± 0.37	0.15 ± 0.12	0.84 ± 0.04	0.72 ± 0.18	0.42 ± 0.23	3.84 ± 0.9	2.91 ± 0.38	0.32 ± 0.15	0.34 ± 0.34
ms 69.033	C4H4OH+	Furan	nd	4.33 ± 1.34	2.18 ± 1.2	2.65 ± 1.47	0.23 ± 0.23	3.19 ± 1.17	1.55 ± 1.55	2.75 ± 1.39	2.18 ± 1.25	1.88 ± 1.55	2.32 ± 0.88	1.72 ± 1.6	0.71 ± 0.71	3.45 ± 0.67	1.86 ± 0.21	0.19 ± 0.19	1.55 ± 1.51	3.52 ± 1.53	2.53 ± 1.28	0.08 ± 0.04	5.67 ± 2.84	1.61 ± 1.61	2.08 ± 1.26	1.36 ± 1.36	3.16 ± 1.62	87.42 ± 3.96	4.99 ± 0.2	2.52 ± 1.5	1.93 ± 1.06	1.6 ± 1.6	2.25 ± 2.06	0.44 ± 0.17	1.74 ± 1.74
ms 71.049	C4H6OH+	Butenal	905.72 ± 179.2	379.54 ± 125.71	nd	724.29 ± 136.74	11.22 ± 10.31	nd	734.38 ± 68.77	7.91 ± 3.16	29.62 ± 29.62	nd	nd	817.95 ± 82.65	1061.69 ± 100.75	930.46 ± 269.55	9.07 ± 6.87	558.27 ± 57.45	775.47 ± 172.08	1002.48 ± 96.16	50.66 ± 11.79	815.6 ± 133.15	353.25 ± 69.72	975.39 ± 275.9	3.75 ± 3.75	nd	786.42 ± 191.87	14.85 ± 1.42	nd	nd	nd	1498.18 ± 510.83	982.81 ± 269.97	252.42 ± 87.43	2.65 ± 2.65
ms 71.085	C5H11+	3-methyl-1-butanol, pentanol	69.07 ± 10.85	50.09 ± 7.5	2.14 ± 1.2	62.32 ± 6.31	0.86 ± 0.07	3.3 ± 1.48	50.25 ± 6.78	2.81 ± 0.97	2.21 ± 1.6	0.2 ± 0.2	1.1 ± 0.42	57.49 ± 8.49	76.61 ± 6.84	113.15 ± 17.17	4.96 ± 1.45	104.88 ± 4.91	36.12 ± 8.96	88.81 ± 7.25	2.5 ± 0.52	78.29 ± 19.37	56.18 ± 14.19	82.71 ± 18.08	1.52 ± 0.89	6.01 ± 0.32	60.9 ± 4.45	5.92 ± 0.73	4.94 ± 2.19	3.34 ± 0.74	0.49 ± 0.3	16.52 ± 3.25	20.39 ± 3.08	5.07 ± 0.78	0.91 ± 0.91
ms 73.0239	C3H4O2H+	Propiolactone, Propenoic acid	0.88 ± 0.07	0.92 ± 0.04	nd	0.87 ± 0.09	0.02 ± 0.02	nd	0.79 ± 0.1	nd	1.56 ± 1.53	nd	2.41 ± 2.26	0.89 ± 0.06	0.88 ± 0.04	0.74 ± 0.18	nd	0.85 ± 0.04	0.69 ± 0.12	0.82 ± 0.13	0.26 ± 0.14	0.85 ± 0.08	0.89 ± 0.03	0.91 ± 0.06	0.02 ± 0.02	0.06 ± 0.05	0.87 ± 0.02	0.07 ± 0.06	0.09 ± 0.09	0.22 ± 0.22	0.06 ± 0.06	1.63 ± 0.78	2.09 ± 0.63	4.43 ± 1.45	0.27 ± 0.12
ms 74.006	C2H3NSH+	common fragment	0.1 ± 0.01	0.15 ± 0.09	nd	0.06 ± 0.02	nd	nd	0.08 ± 0.03	nd	nd	nd	nd	0.12 ± 0.02	0.05 ± 0.01	0.03 ± 0.01	nd	0.07 ± 0.01	0.05 ± 0.01	0.07 ± 0.02	0.01 ± 0.01	0.06 ± 0.01	0.27 ± 0.06	0.08 ± 0.03	nd	0.01 ± 0.01	0.07 ± 0.01	0.02 ± 0.01	0.03 ± 0.01	0.02 ± 0.01	0.01 ± 0.01	0.04 ± 0.02	0.06 ± 0.01	0.02 ± 0.01	0.01 ± 0.01
ms 75.044	C3H6O2H+	Methyl acetate	9.81 ± 1.4	6.02 ± 0.74	1.39 ± 0.5	3.69 ± 0.9	31.33 ± 3.36	1.22 ± 0.31	2.63 ± 0.75	1.33 ± 0.18	5.02 ± 4.28	1.93 ± 1.64	1.5 ± 1.05	8.89 ± 1.7	12.5 ± 1.27	9.91 ± 2	2.09 ± 0.68	2.27 ± 0.11	5.52 ± 0.77	4.89 ± 0.51	3.14 ± 0.3	8.72 ± 1.79	5.21 ± 0.46	4.03 ± 1.24	1.81 ± 0.31	0.65 ± 0.33	3.69 ± 0.48	8.25 ± 1.6	7.6 ± 0.75	4.59 ± 0.67	0.43 ± 0.22	10.08 ± 0.58	11.5 ± 1.16	96.05 ± 5.05	2.18 ± 0.87
ms 75.0782	C4H9OH+	1-butanol	2.7 ± 0.42	4.08 ± 1.24	nd	1.79 ± 0.29	nd	nd	1.65 ± 0.12	nd	nd	nd	nd	2.3 ± 0.41	1.8 ± 0.33	1.69 ± 0.39	nd	2.11 ± 0.26	2.57 ± 0.27	2.91 ± 0.32	0.15 ± 0.08	1.94 ± 0.55	4.8 ± 0.6	2.6 ± 0.71	0.01 ± 0.01	nd	1.88 ± 0.24	0.83 ± 0.19	0.29 ± 0.09	0.95 ± 0.35	0.03 ± 0.03	12.55 ± 4.34	8.35 ± 0.85	1.14 ± 0.19	0.15 ± 0.08
ms 77.043	C3H8SH+	2-propanethiol	0.14 ± 0.11	0.47 ± 0.01	0.69 ± 0.3	0.72 ± 0.43	0.09 ± 0.09	0.91 ± 0.21	0.37 ± 0.31	0.7 ± 0.35	0.77 ± 0.27	0.37 ± 0.25	0.86 ± 0.18	0.48 ± 0.22	0.7 ± 0.21	1.42 ± 0.37	0.76 ± 0.19	0.12 ± 0.09	0.36 ± 0.34	0.77 ± 0.28	0.68 ± 0.24	0.72 ± 0.17	0.41 ± 0.25	0.43 ± 0.43	0.69 ± 0.17	0.55 ± 0.3	0.55 ± 0.27	0.49 ± 0.25	1.79 ± 0.14	0.69 ± 0.44	0.3 ± 0.18	0.4 ± 0.29	0.74 ± 0.56	1.4 ± 0.13	0.41 ± 0.41
ms 77.06	C3H8O2H+	common fragment	0.68 ± 0.11	0.83 ± 0.26	0.3 ± 0.05	0.48 ± 0.19	nd	0.5 ± 0.13	0.35 ± 0.16	0.22 ± 0.13	0.19 ± 0.1	0.24 ± 0.03	0.28 ± 0.12	0.51 ± 0.21	0.62 ± 0.16	1.1 ± 0.24	0.17 ± 0.09	0.34 ± 0.07	1.03 ± 0.11	0.67 ± 0.14	0.23 ± 0.2	0.9 ± 0.4	0.92 ± 0.11	1.15 ± 0.54	0.28 ± 0.08	0.22 ± 0.01	0.53 ± 0.04	0.42 ± 0.22	0.44 ± 0.09	0.73 ± 0.36	0.13 ± 0.11	1.81 ± 0.46	1.76 ± 0.24	0.89 ± 0.26	0.59 ± 0.03
ms 78.967	CH2S2H+	common fragment	0.07 ± 0.02	0.45 ± 0.34	0.2 ± 0.09	0.31 ± 0.04	0.07 ± 0.07	0.12 ± 0.04	0.37 ± 0.27	0.12 ± 0.07	0.11 ± 0.11	0.02 ± 0.02	0.04 ± 0.02	0.18 ± 0.09	0.68 ± 0.1	0.22 ± 0.05	0.12 ± 0.06	0.09 ± 0.05	0.81 ± 0.22	0.22 ± 0.02	0.16 ± 0.07	0.14 ± 0.02	0.23 ± 0.11	0.07 ± 0.03	0.07 ± 0.01	0.08 ± 0.05	0.29 ± 0.14	0.12 ± 0.02	0.4 ± 0.22	0.21 ± 0.03	0.07 ± 0.04	0.13 ± 0.04	0.15 ± 0.05	0.68 ± 0.32	0.08 ± 0.08
ms 79.0195	C2H6OSH+	dimethyl sulfoxide	0.32 ± 0.03	0.18 ± 0.05	0.06 ± 0.03	0.38 ± 0.05	0.02 ± 0.01	0.08 ± 0.03	0.22 ± 0.06	0.05 ± 0.03	0.1 ± 0.04	0.05 ± 0.03	0.07 ± 0.03	0.44 ± 0.16	0.33 ± 0.04	0.48 ± 0.06	0.2 ± 0.05	0.22 ± 0.04	0.25 ± 0.08	0.25 ± 0.06	0.3 ± 0.18	0.41 ± 0.05	0.33 ± 0.13	0.24 ± 0.08	0.09 ± 0.05	0.1 ± 0.04	0.29 ± 0.07	0.12 ± 0.06	0.33 ± 0.07	0.26 ± 0.06	0.09 ± 0.02	0.33 ± 0.09	0.32 ± 0.07	0.37 ± 0.1	0.03 ± 0.02
ms 79.0721			1.47 ± 0.15	1.43 ± 0.17	0.05 ± 0.05	0.97 ± 0.15	nd	0.06 ± 0.03	0.75 ± 0.11	0.05 ± 0.03	0.04 ± 0.04	0.07 ± 0.07	0.07 ± 0.05	1.24 ± 0.2	1.47 ± 0.13	1.59 ± 0.24	0.01 ± 0.01	0.85 ± 0.05	1.84 ± 0.15	1.43 ± 0.21	0.11 ± 0.04	1.36 ± 0.32	1.54 ± 0.22	1.98 ± 0.4	0.05 ± 0.05	0.04 ± 0.04	0.93 ± 0.11	0.91 ± 0.2	0.68 ± 0.05	1.1 ± 0.34	0.07 ± 0.07	5.48 ± 1.53	4.01 ± 0.15	1.82 ± 0.22	0.12 ± 0.11
ms 81.03			0.81 ± 0.15	1.08 ± 0.18	0.66 ± 0.21	1.02 ± 0.18	0.08 ± 0.06	0.72 ± 0.09	0.83 ± 0.22	0.65 ± 0.12	0.71 ± 0.11	0.16 ± 0.16	0.76 ± 0.07	1.01 ± 0.19	0.91 ± 0.07	1.45 ± 0.14	0.61 ± 0.04	0.7 ± 0.09	1 ± 0.11	1.22 ± 0.11	0.89 ± 0.16	1.04 ± 0.17	0.95 ± 0.07	1.18 ± 0.13	0.68 ± 0.15	0.47 ± 0.19	0.9 ± 0.17	0.72 ± 0.12	1.24 ± 0.08	1.19 ± 0.13	0.23 ± 0.13	1.32 ± 0.2	1.53 ± 0.27	11.25 ± 1.14	0.17 ± 0.17
ms 85.0324	C4H4O2H+	Furanone	0.08 ± 0.04	0.02 ± 0.01	nd	0.05 ± 0.01	0.02 ± 0.01	0.01 ± 0.01	0.07 ± 0.02	0.01 ± 0	0.01 ± 0.01	0.01 ± 0.01	nd	0.06 ± 0.06	0.1 ± 0.03	0.13 ± 0.02	nd	0.02 ± 0	0.13 ± 0.03	0.07 ± 0.03	0.05 ± 0.02	0.09 ± 0.05	0.05 ± 0.02	0.12 ± 0.06	nd	nd	0.07 ± 0.02	0.05 ± 0.02	0.03 ± 0.02	0.06 ± 0.02	0.04 ± 0.02	0.29 ± 0.07	0.26 ± 0.09	0.07 ± 0.03	0.05 ± 0.01
ms 85.065	C5H8OH+	(E)-2-Pentenal	1.75 ± 0.43	0.09 ± 0.09	nd	0.27 ± 0.14	nd	nd	0.08 ± 0.07	nd	0.13 ± 0.06	0.13 ± 0.07	0.07 ± 0.05	1.66 ± 0.34	3.41 ± 0.33	4 ± 1.17	nd	nd	9.62 ± 2.2	0.92 ± 0.13	0.53 ± 0.09	2.44 ± 0.38	nd	0.92 ± 0.61	nd	nd	0.3 ± 0.18	nd	nd	nd	0.09 ± 0.06	13.35 ± 5.33	7.99 ± 2.76	0.6 ± 0.33	0.49 ± 0.35
ms 85.101	C6H13+	Hexanol	nd	0.25 ± 0.15	0.87 ± 0.6	1.73 ± 1.38	nd	1.44 ± 0.73	0.19 ± 0.19	1.28 ± 0.53	0.92 ± 0.83	0.15 ± 0.15	0.37 ± 0.25	0.15 ± 0.15	0.08 ± 0.06	0.72 ± 0.11	2.28 ± 0.78	0.23 ± 0.19	0.68 ± 0.1	0.68 ± 0.33	0.28 ± 0.14	0.01 ± 0	0.34 ± 0.17	1.66 ± 1.56	0.68 ± 0.54	0.14 ± 0.14	0.62 ± 0.34	0.05 ± 0.03	1.58 ± 1.02	0.28 ± 0.11	0.26 ± 0.14	0.55 ± 0.18	0.59 ± 0.29	2.7 ± 0.16	0.42 ± 0.42
ms 87.044	C4H6O2H+	Butyrolactone	7.9 ± 0.76	4.72 ± 1.72	nd	4.07 ± 0.62	1.61 ± 0.12	0.69 ± 0.37	4.53 ± 0.47	nd	0.36 ± 0.36	nd	nd	6.67 ± 0.84	10.36 ± 1.73	7.16 ± 2.2	nd	3.6 ± 0.2	5.13 ± 1.06	5.43 ± 0.36	0.72 ± 0.49	6.94 ± 0.62	4.36 ± 1.09	5.31 ± 1.46	nd	0.83 ± 0.16	4.41 ± 0.8	1.34 ± 0.45	nd	10.17 ± 1.89	nd	9.05 ± 2.44	6.21 ± 1.55	1.65 ± 0.56	0.81 ± 0.33
ms 87.08	C5H10OH+	Pentanal, pentanone	2.52 ± 0.4	3.55 ± 1.16	nd	0.19 ± 0.19	nd	nd	nd	nd	nd	1.07 ± 0.26	nd	2 ± 0.92	7.2 ± 1.93	3.12 ± 1.94	nd	0.01 ± 0.01	1.14 ± 0.59	0.43 ± 0.31	nd	3.61 ± 0.96	5.79 ± 0.29	0.04 ± 0.04	nd	nd	nd	nd	nd	nd	1.9 ± 0.38	0.08 ± 0.08	0.39 ± 0.33	0.03 ± 0.03	2.5 ± 1.6
ms 89.0595	C4H8O2H+	ethyl acetate, butanoic acid	1082.64 ± 208.57	457.55 ± 150.56	0.47 ± 0.47	857.94 ± 163.22	43.97 ± 12.55	nd	864.12 ± 79.1	13.35 ± 3.94	35.73 ± 35.73	nd	nd	989.34 ± 100.65	1304.79 ± 112.27	1150.91 ± 327.12	13.81 ± 8.97	662.07 ± 72.33	932.44 ± 206.15	1196.79 ± 111.59	61.38 ± 14.34	983.74 ± 163.02	426.81 ± 81.45	1120.75 ± 310.17	6.69 ± 4.97	nd	931.79 ± 226.21	23.46 ± 1.71	nd	nd	nd	1757.03 ± 555.63	1204.62 ± 333.66	1562.38 ± 164.86	3.54 ± 3.54
ms 91.017	C3H6OSH+	Methylthioacetate, mercaptoacetone	0.31 ± 0.07	0.29 ± 0.04	0.05 ± 0.01	0.11 ± 0.03	0.02 ± 0.01	0.06 ± 0.01	0.08 ± 0.03	0.01 ± 0	0.01 ± 0	0.01 ± 0	0.02 ± 0.02	0.36 ± 0.08	0.38 ± 0.02	0.56 ± 0.07	0.05 ± 0.01	0.06 ± 0.01	0.22 ± 0.03	0.14 ± 0.04	0.06 ± 0	0.42 ± 0.06	0.28 ± 0.05	0.11 ± 0.05	0.01 ± 0.01	0.07 ± 0.01	0.12 ± 0.03	0.18 ± 0.02	0.18 ± 0.01	0.2 ± 0.03	0.01 ± 0	0.57 ± 0.3	0.55 ± 0.08	0.2 ± 0.02	0.01 ± 0
ms 91.0572	C4H10SH+	Diethyl sulfide, 1-Butanethiol	4.36 ± 0.96	3.41 ± 0.49	0.11 ± 0.09	4.36 ± 0.93	0.1 ± 0.05	0.12 ± 0.12	3.88 ± 0.3	0.14 ± 0.07	0.26 ± 0.08	nd	0.03 ± 0.02	4.63 ± 0.62	5.93 ± 0.51	5 ± 0.18	0.11 ± 0.04	3.15 ± 0.25	5.43 ± 0.61	6.05 ± 0.3	0.48 ± 0.06	4.76 ± 0.81	3.04 ± 0.19	4.02 ± 0.42	0.05 ± 0.03	nd	4.41 ± 0.57	1.35 ± 0.19	1.31 ± 0.04	1.12 ± 0.35	0.03 ± 0.03	5.77 ± 1.48	8.47 ± 2.27	5.94 ± 0.48	0.21 ± 0.21
ms 91.073	C4H10O2H+	Butanediol	5.7 ± 0.59	5.94 ± 2.67	nd	2.61 ± 0.48	0.01 ± 0.01	nd	2.65 ± 0.76	nd	nd	nd	nd	4.83 ± 0.78	3.88 ± 0.38	2.94 ± 0.86	0.02 ± 0.02	2.29 ± 0.27	5.05 ± 0.7	3.63 ± 0.73	0.42 ± 0.2	4.28 ± 0.86	8.37 ± 1.79	3.48 ± 0.98	0.06 ± 0.04	nd	2.92 ± 0.52	0.85 ± 0.36	0.42 ± 0.15	3.53 ± 1.05	0.05 ± 0.05	6.84 ± 1.55	10.6 ± 1.38	4.45 ± 1.29	0.38 ± 0.2
ms 94.9952			0.28 ± 0.12	1.39 ± 0.93	0.42 ± 0.16	0.75 ± 0.16	0.18 ± 0.16	0.25 ± 0.08	0.91 ± 0.65	0.31 ± 0.16	0.3 ± 0.21	0.05 ± 0.02	0.14 ± 0.06	0.57 ± 0.3	2.11 ± 0.36	0.61 ± 0.15	0.33 ± 0.14	0.29 ± 0.1	2.52 ± 0.6	0.67 ± 0.06	0.38 ± 0.14	0.48 ± 0.03	0.66 ± 0.29	0.1 ± 0.1	0.12 ± 0.05	0.24 ± 0.13	0.62 ± 0.31	0.28 ± 0.05	0.84 ± 0.37	0.48 ± 0.08	0.11 ± 0.06	0.36 ± 0.17	0.55 ± 0.22	1.3 ± 0.8	0.14 ± 0.13
ms 95.0161	C2H6O2SH+		0.18 ± 0.05	0.48 ± 0.27	0.41 ± 0.17	0.45 ± 0.11	0.03 ± 0.03	0.59 ± 0.18	0.46 ± 0.31	0.4 ± 0.22	0.45 ± 0.24	0.33 ± 0.17	0.54 ± 0.04	0.53 ± 0.12	0.89 ± 0.07	0.75 ± 0.14	0.49 ± 0.1	0.08 ± 0.06	0.83 ± 0.04	0.5 ± 0.16	0.55 ± 0.26	0.42 ± 0.12	0.33 ± 0.22	0.19 ± 0.19	0.46 ± 0.09	0.34 ± 0.13	0.5 ± 0.25	0.34 ± 0.18	1.24 ± 0.13	0.64 ± 0.37	0.27 ± 0.14	0.17 ± 0.13	0.36 ± 0.28	0.38 ± 0.19	0.29 ± 0.29
ms 95.0506	C6H6OH+	Furfural, 5-methyl-	nd	2.51 ± 0.32	0.47 ± 0.24	0.03 ± 0.03	nd	nd	nd	nd	nd	0.08 ± 0.08	nd	0.02 ± 0.02	nd	0.03 ± 0.03	nd	nd	nd	0.04 ± 0.04	nd	nd	2.98 ± 0.12	1.37 ± 0.33	0.02 ± 0.02	0.03 ± 0.03	0.08 ± 0.08	0.01 ± 0.01	1.99 ± 0.08	2.37 ± 0.2	0.28 ± 0.12	2.37 ± 0.19	2.48 ± 0.27	0.17 ± 0.06	0.08 ± 0.08
ms 95.9517			nd	0.01 ± 0.01	0.01 ± 0.01	0.01 ± 0.01	0.01 ± 0	nd	nd	0.01 ± 0	0.01 ± 0	0.01 ± 0.01	0.01 ± 0.01	0.01 ± 0.01	0.01 ± 0.01	0.02 ± 0.01	0.02 ± 0.01	nd	nd	nd	0.01 ± 0.01	0.01 ± 0.01	nd	nd	0.01 ± 0	0.02 ± 0.01	0.01 ± 0	nd	0.01 ± 0.01	0.01 ± 0	0.01 ± 0	nd	nd	nd	nd
ms 97.0274	C5H4O2H+	Furfural	nd	nd	nd	nd	nd	nd	nd	nd	nd	3.14 ± 1.57	nd	nd	nd	nd	nd	nd	nd	nd	nd	nd	nd	nd	nd	nd	nd	nd	nd	nd	1.63 ± 1.63	nd	nd	nd	3.95 ± 1.98
ms 97.101	C7H13+	Heptanal	nd	4.21 ± 4.21	7.06 ± 3.62	8.1 ± 4.32	nd	10.2 ± 1.83	3.96 ± 3.96	7.19 ± 3.6	5.72 ± 3.13	2.02 ± 2.02	5.13 ± 2.78	4.47 ± 4.47	0.84 ± 0.84	11.49 ± 1.38	5.21 ± 2.63	2.29 ± 2.29	4.34 ± 4.34	7.86 ± 3.93	7.51 ± 3.76	nd	5.67 ± 3.83	4.62 ± 4.62	4.58 ± 4.58	3.6 ± 3.6	8.89 ± 4.46	nd	10.93 ± 0.52	6.79 ± 3.66	3.57 ± 1.79	3.83 ± 3.83	5.03 ± 5.03	nd	1.82 ± 1.82
ms 99.08	C6H10OH+	2-Hexenal*, (2E)-Hexenal	nd	nd	nd	nd	nd	nd	nd	nd	nd	0.1 ± 0.04	nd	nd	nd	nd	nd	nd	nd	nd	nd	nd	nd	nd	nd	nd	nd	nd	nd	nd	0.15 ± 0.07	0.14 ± 0.14	0.02 ± 0.02	nd	0.42 ± 0.29
ms 101.0247			0.03 ± 0.02	0.05 ± 0.02	0.01 ± 0.01	0.04 ± 0.01	0.07 ± 0.02	0.01 ± 0.01	0.04 ± 0.02	0.01 ± 0.01	nd	0.01 ± 0.01	nd	0.03 ± 0.01	0.07 ± 0	0.07 ± 0.02	0.02 ± 0	0.04 ± 0.02	0.03 ± 0.01	0.06 ± 0.01	nd	0.04 ± 0.02	0.02 ± 0.01	0.04 ± 0.02	nd	nd	0.02 ± 0.01	0.02 ± 0.01	0.03 ± 0.01	0.03 ± 0.01	0.01 ± 0.01	0.06 ± 0.01	0.04 ± 0.01	0.03 ± 0.01	0.01 ± 0.01
ms 101.0605	C5H8O2H+	2-Butenoic acid methyl ester	0.11 ± 0.03	0.06 ± 0.02	nd	0.12 ± 0.03	3.94 ± 0.13	0.14 ± 0.03	0.05 ± 0.02	0.01 ± 0	nd	0.01 ± 0	nd	0.08 ± 0.04	2.1 ± 0.28	0.17 ± 0.06	0.03 ± 0.02	0.05 ± 0.01	0.24 ± 0.02	0.12 ± 0.02	0.01 ± 0.01	0.08 ± 0.04	0.05 ± 0.01	0.18 ± 0.05	nd	0.13 ± 0.05	0.07 ± 0.02	0.28 ± 0.07	0.01 ± 0.01	0.51 ± 0.13	0.03 ± 0.01	0.33 ± 0.09	0.26 ± 0.06	0.35 ± 0.09	0.09 ± 0.01
ms 103.0477	C4H6O3H+		0.58 ± 0.2	0.59 ± 0.15	0.02 ± 0.02	0.85 ± 0.25	0.21 ± 0.11	0.03 ± 0.01	0.6 ± 0.24	0.03 ± 0.01	0.05 ± 0.02	0.02 ± 0.02	nd	0.69 ± 0.21	0.78 ± 0.1	1.31 ± 0.27	0.09 ± 0.01	0.68 ± 0.05	0.38 ± 0.09	1.18 ± 0.21	0.05 ± 0.02	0.67 ± 0.21	0.54 ± 0.11	0.4 ± 0.34	0.03 ± 0.03	nd	0.73 ± 0.15	0.06 ± 0.02	0.09 ± 0.04	0.03 ± 0.02	0.02 ± 0.02	0.5 ± 0.11	0.64 ± 0.26	0.12 ± 0.03	0.03 ± 0.03
ms 103.07	C5H10O2H+	C5 esters and acids (methyl butyrate, pentanoic acid, 2-methyl butanoic acid)	4.59 ± 0.72	2.25 ± 0.52	0.31 ± 0.11	2.56 ± 0.45	19.51 ± 2.19	0.54 ± 0.33	2.05 ± 0.19	0.26 ± 0.09	0.72 ± 0.61	0.31 ± 0.31	0.13 ± 0.13	4.86 ± 0.53	12.55 ± 0.47	9.83 ± 1.31	2.75 ± 0.36	2.2 ± 0.26	12.63 ± 2.24	4.13 ± 0.36	1.78 ± 0.27	5.46 ± 0.71	2.54 ± 0.31	3.34 ± 0.9	0.22 ± 0.1	0.24 ± 0.09	2.63 ± 0.24	0.66 ± 0.1	0.2 ± 0.03	0.32 ± 0.04	nd	17.87 ± 3.8	11.6 ± 2.64	3.8 ± 0.64	0.22 ± 0.12
ms 105.0397	C4H8OSH+	Methional	0.07 ± 0.02	0.08 ± 0.03	nd	0.06 ± 0.01	nd	0.01 ± 0	0.06 ± 0.01	0.01 ± 0	nd	nd	nd	0.1 ± 0.02	0.13 ± 0.01	0.13 ± 0.02	0.02 ± 0.01	0.06 ± 0.01	0.06 ± 0.02	0.1 ± 0.02	nd	0.12 ± 0.02	0.05 ± 0.01	0.05 ± 0.02	nd	nd	0.06 ± 0.02	0.02 ± 0.01	0.02 ± 0.01	0.05 ± 0.01	0.01 ± 0.01	0.05 ± 0.03	0.09 ± 0.06	0.2 ± 0.05	0.02 ± 0.01
ms 105.0725	C5H12SH+		0.51 ± 0.14	0.91 ± 0.28	0.2 ± 0.12	1.17 ± 0.21	0.3 ± 0.14	0.25 ± 0.05	1.18 ± 0.7	0.62 ± 0.37	0.09 ± 0.08	0.11 ± 0.11	0.1 ± 0.05	0.72 ± 0.2	0.92 ± 0.07	1.85 ± 0.31	0.35 ± 0.09	1.14 ± 0.42	1.19 ± 0.27	1.57 ± 0.34	0.21 ± 0.12	0.79 ± 0.21	0.63 ± 0.15	1.58 ± 0.66	0.52 ± 0.31	0.1 ± 0.1	1.27 ± 0.31	0.41 ± 0.06	0.39 ± 0.05	0.21 ± 0.09	0.18 ± 0.09	0.98 ± 0.23	1.18 ± 0.32	0.46 ± 0.16	0.2 ± 0.2
ms 107.0349	C7H6OH+	Benzaldehyde	nd	nd	nd	nd	nd	nd	nd	nd	nd	0.03 ± 0.02	nd	nd	nd	nd	nd	nd	nd	nd	nd	nd	nd	nd	nd	nd	nd	nd	nd	nd	0.43 ± 0.11	nd	nd	nd	0.51 ± 0.27
ms 108.9584			nd	nd	0.03 ± 0.02	nd	0.01 ± 0.01	0.06 ± 0.01	0.01 ± 0.01	0.03 ± 0.02	0.03 ± 0.01	0.03 ± 0	0.04 ± 0.01	nd	0.01 ± 0.01	nd	0.04 ± 0.01	nd	nd	nd	0.02 ± 0.01	nd	nd	0.02 ± 0.01	0.05 ± 0.03	0.01 ± 0.01	nd	nd	0.01 ± 0.01	0.01 ± 0.01	0.04 ± 0.01	nd	nd	nd	0.06 ± 0.02
ms 109.068	C7H8OH+	Benzyl alcohol, Cresol	0.12 ± 0.05	0.1 ± 0.02	0.04 ± 0.02	0.11 ± 0.02	0.02 ± 0.01	0.04 ± 0.01	0.08 ± 0.02	0.03 ± 0.01	0.03 ± 0.01	0.02 ± 0.01	0.03 ± 0.01	0.11 ± 0.01	0.14 ± 0.02	0.18 ± 0.05	0.04 ± 0.01	0.09 ± 0.01	0.14 ± 0.02	0.16 ± 0.01	0.03 ± 0.01	0.13 ± 0.04	0.09 ± 0.01	0.17 ± 0.05	0.01 ± 0	0.01 ± 0.01	0.1 ± 0.01	0.04 ± 0	0.07 ± 0.01	0.08 ± 0	0.04 ± 0.01	0.33 ± 0.05	0.3 ± 0.07	0.18 ± 0.03	0.05 ± 0.03
ms 111.0445	C6H6O2H+	3-Methylfurfural	0.01 ± 0.01	nd	nd	nd	nd	nd	nd	nd	nd	0.01 ± 0.01	nd	nd	nd	0.02 ± 0.02	nd	nd	nd	nd	nd	nd	0.01 ± 0.01	0.1 ± 0.07	nd	nd	nd	nd	nd	0.02 ± 0.02	0.03 ± 0.02	0.1 ± 0.09	0.02 ± 0.02	nd	0.07 ± 0.03
ms 113.0844	C7H12OH+	Heptanal, Heptanone	0.02 ± 0.01	0.03 ± 0.02	0.01 ± 0.01	0.02 ± 0.02	nd	0.04 ± 0.02	0.01 ± 0.01	0.01 ± 0.01	nd	0.01 ± 0.01	nd	0.01 ± 0.01	0.14 ± 0.01	0.13 ± 0.02	nd	0.01 ± 0.01	0.02 ± 0.01	0.03 ± 0.01	0.3 ± 0.07	0.02 ± 0.02	0.02 ± 0.01	0.03 ± 0.01	nd	nd	0.04 ± 0.01	0.01 ± 0.01	0.04 ± 0.01	0.02 ± 0.01	0.03 ± 0.01	0.06 ± 0.03	0.06 ± 0.01	0.04 ± 0.02	0.05 ± 0.03
ms 115.0373			0.03 ± 0.02	0.01 ± 0.01	nd	0.01 ± 0	0.08 ± 0.01	nd	nd	nd	nd	nd	nd	0.01 ± 0.01	0.03 ± 0.01	0.05 ± 0.02	nd	nd	nd	0.01 ± 0.01	nd	0.01 ± 0.01	0.01 ± 0.01	0.03 ± 0.02	nd	nd	nd	nd	0.01 ± 0.01	0.01 ± 0.01	0.01 ± 0.01	0.06 ± 0.02	0.04 ± 0.02	0.01 ± 0.01	0.01 ± 0.01
ms 115.07	C6H10O2H+	Ethyl Crotonate (Ethyl (2E) -2-butenoate) *, 5-Ethyldihydro-2(3 H)-Furanone*	0.13 ± 0.01	0.11 ± 0.06	0.02 ± 0.01	0.05 ± 0.01	3.37 ± 0.06	0.08 ± 0.02	0.07 ± 0.03	0.01 ± 0.01	0.22 ± 0.07	0.01 ± 0.01	0.06 ± 0.04	0.11 ± 0.02	1.16 ± 0.08	0.18 ± 0.06	0.25 ± 0.08	0.03 ± 0.01	0.16 ± 0.03	0.09 ± 0.03	0.03 ± 0.03	0.1 ± 0.05	0.12 ± 0.04	0.1 ± 0.04	0.01 ± 0.01	0.03 ± 0.02	0.05 ± 0.02	0.02 ± 0.01	0.01 ± 0.01	0.04 ± 0.03	0.03 ± 0.01	0.39 ± 0.13	0.23 ± 0.09	0.17 ± 0.06	0.04 ± 0.01
ms 115.11	C7H14OH+	Γ-Hexalactone*,Heptanone, Heptanal	0.07 ± 0.05	0.45 ± 0.06	0.53 ± 0.21	0.13 ± 0.12	0.63 ± 0.21	0.55 ± 0.11	0.07 ± 0.04	0.55 ± 0.11	4.11 ± 1.44	0.37 ± 0.15	5.99 ± 0.11	0.17 ± 0.08	0.79 ± 0	1.39 ± 0.16	0.54 ± 0.07	0.04 ± 0.03	0.42 ± 0.14	0.11 ± 0.06	2.58 ± 0.18	0.3 ± 0.09	0.42 ± 0.21	0.08 ± 0.08	0.66 ± 0.16	0.25 ± 0.13	0.16 ± 0.12	0.21 ± 0.11	0.67 ± 0.01	1.79 ± 0.28	0.14 ± 0.08	0.35 ± 0.19	0.67 ± 0.29	0.38 ± 0.07	0.26 ± 0.24
ms 117.0463			0.06 ± 0.03	0.14 ± 0.03	nd	0.33 ± 0.05	0.16 ± 0.04	0.01 ± 0.01	0.17 ± 0.13	nd	0.01 ± 0.01	nd	nd	0.1 ± 0.04	0.12 ± 0.06	0.14 ± 0.03	0.01 ± 0.01	0.14 ± 0.03	0.94 ± 0.3	0.3 ± 0.07	0.13 ± 0.02	0.06 ± 0.03	0.44 ± 0.17	0.29 ± 0.1	0.02 ± 0.02	0.01 ± 0.01	0.22 ± 0.07	0.07 ± 0.03	0.06 ± 0.02	0.06 ± 0.03	nd	0.98 ± 0.31	0.87 ± 0.26	1.08 ± 0.62	0.06 ± 0.04
ms 117.0917	C6H12O2H+	Isobutyl Acetate*, Butyl Acetate*, Hexanoic Acid*, ethyl butanoate	2.71 ± 0.64	1.42 ± 0.42	0.04 ± 0.02	1.53 ± 0.37	16.65 ± 1.64	0.03 ± 0.02	1.38 ± 0.17	0.02 ± 0.02	nd	nd	nd	2.25 ± 0.4	10.67 ± 0.94	2.94 ± 0.81	0.26 ± 0.01	1.26 ± 0.16	2.99 ± 0.5	3.03 ± 0.28	0.25 ± 0.05	2.43 ± 0.65	1.41 ± 0.13	2.8 ± 0.9	0.05 ± 0.03	0.03 ± 0.02	1.77 ± 0.28	0.4 ± 0.11	0.35 ± 0.05	0.43 ± 0.08	0.11 ± 0.03	12.1 ± 4.97	7.23 ± 1.88	3.39 ± 0.27	0.33 ± 0.09
ms 119.0334	C5H10OSH+	3-mercapto-2-pentanone	0.01 ± 0	0.01 ± 0.01	nd	0.02 ± 0	nd	nd	0.01 ± 0.01	nd	0.01 ± 0.01	0.01 ± 0	nd	nd	0.02 ± 0	0.01 ± 0	nd	0.01 ± 0	0.05 ± 0.01	0.02 ± 0	nd	0.01 ± 0.01	0.01 ± 0.01	0.03 ± 0	nd	nd	0.02 ± 0	0.02 ± 0	0.01 ± 0.01	0.02 ± 0	nd	0.06 ± 0.01	0.06 ± 0.01	0.07 ± 0.02	nd
ms 121.0611	C8H8OH+	Acetophenone	0.19 ± 0.03	0.39 ± 0.14	0.13 ± 0.04	0.09 ± 0	nd	nd	nd	nd	nd	0.02 ± 0.01	nd	0.24 ± 0.03	0.19 ± 0.01	0.17 ± 0.06	nd	nd	0.16 ± 0.03	0.07 ± 0.02	0.06 ± 0.02	0.1 ± 0.01	0.4 ± 0.08	0.37 ± 0.11	0.02 ± 0.02	nd	nd	0.12 ± 0.03	0.24 ± 0.04	0.32 ± 0.08	0.13 ± 0.02	0.67 ± 0.25	0.57 ± 0.08	0.28 ± 0.03	0.06 ± 0.02
ms 121.9707			0.04 ± 0.01	0.05 ± 0	nd	0.03 ± 0	nd	0.01 ± 0	0.03 ± 0	nd	nd	nd	nd	0.03 ± 0.01	0.05 ± 0.01	0.04 ± 0	nd	0.04 ± 0.01	0.05 ± 0.01	0.06 ± 0.02	nd	0.04 ± 0	0.04 ± 0	0.04 ± 0.01	nd	0.01 ± 0.01	0.04 ± 0	0.04 ± 0.01	0.02 ± 0	0.04 ± 0.01	nd	0.09 ± 0.01	0.08 ± 0.01	0.04 ± 0.01	nd
ms 123.0777	C8H10OH+	2-phenylethanol	0.03 ± 0.02	0.05 ± 0.01	0.03 ± 0.02	0.05 ± 0	0.01 ± 0.01	0.03 ± 0.01	0.03 ± 0.02	0.01 ± 0.01	0.02 ± 0.02	0.03 ± 0.02	0.02 ± 0.01	nd	0.02 ± 0.01	0.02 ± 0.01	0.04 ± 0.02	0.02 ± 0.01	0.04 ± 0.01	0.04 ± 0.02	0.02 ± 0.01	0.02 ± 0.01	0.02 ± 0.01	0.06 ± 0.03	0.02 ± 0.02	0.01 ± 0.01	0.05 ± 0.01	0.01 ± 0	0.06 ± 0.01	0.06 ± 0	0.04 ± 0.02	0.06 ± 0.03	0.06 ± 0.03	0.02 ± 0	0.04 ± 0.03
ms 123.9462			0.11 ± 0.01	0.12 ± 0.01	nd	0.06 ± 0.01	nd	0.01 ± 0.01	0.05 ± 0.01	0.01 ± 0.01	0.03 ± 0.01	0.03 ± 0	0.05 ± 0.02	0.13 ± 0.02	0.11 ± 0	0.13 ± 0.04	0.03 ± 0	0.03 ± 0.01	0.04 ± 0.01	0.05 ± 0.02	0.03 ± 0	0.15 ± 0.01	0.07 ± 0.01	0.04 ± 0.02	0.01 ± 0.01	0.01 ± 0.01	0.04 ± 0.01	0.06 ± 0.02	0.07 ± 0.01	0.06 ± 0.02	0.06 ± 0.01	0.06 ± 0.02	0.15 ± 0.02	0.02 ± 0.01	0.02 ± 0.02
ms 125.0551			nd	0.16 ± 0.02	0.01 ± 0.01	nd	nd	nd	nd	nd	nd	nd	nd	nd	0.01 ± 0	0.02 ± 0.01	nd	nd	0.01 ± 0	0.01 ± 0.01	nd	nd	0.13 ± 0.01	0.03 ± 0.01	nd	nd	0.01 ± 0.01	nd	0.01 ± 0	0.04 ± 0.02	nd	0.04 ± 0.02	0.03 ± 0.01	nd	nd
ms 127.037			0.06 ± 0.03	0.03 ± 0	nd	0.04 ± 0.01	0.02 ± 0.01	nd	0.06 ± 0.01	nd	0.02 ± 0	nd	nd	0.04 ± 0.02	0.05 ± 0.02	0.07 ± 0.02	0.76 ± 0.13	0.03 ± 0	0.04 ± 0.01	0.05 ± 0.02	0.02 ± 0.02	0.04 ± 0.02	0.02 ± 0.01	0.08 ± 0.04	nd	0.01 ± 0.01	0.03 ± 0	0.01 ± 0.01	0.02 ± 0	0.03 ± 0.02	0.01 ± 0	0.11 ± 0.06	0.07 ± 0.02	0.03 ± 0.01	0.02 ± 0
ms 127.0704	C7H10O2H+	2(3H)-Furanone, 5-ethenyldihydro-5-methyl-	0.02 ± 0.01	0.02 ± 0	0.01 ± 0.01	0.02 ± 0.01	0.03 ± 0.01	0.02 ± 0.01	0.02 ± 0.01	0.01 ± 0.01	0.01 ± 0.01	nd	0.01 ± 0.01	0.01 ± 0.01	0.02 ± 0.01	0.02 ± 0.01	0.06 ± 0.01	0.01 ± 0.01	0.03 ± 0	0.03 ± 0	0.02 ± 0.01	0.01 ± 0.01	0.02 ± 0.02	0.04 ± 0	nd	0.01 ± 0.01	0.02 ± 0	nd	0.02 ± 0.01	0.01 ± 0	0.01 ± 0	0.06 ± 0.01	0.02 ± 0.01	0.02 ± 0	0.01 ± 0
ms 129.0552	C6H8O3H+	Furaneol	0.01 ± 0.01	0.01 ± 0.01	0.01 ± 0	0.01 ± 0.01	0.11 ± 0.04	0.01 ± 0.01	0.01 ± 0	0.01 ± 0	nd	0.01 ± 0.01	nd	0.02 ± 0.01	0.06 ± 0.01	0.03 ± 0.01	0.01 ± 0	0.02 ± 0.01	0.01 ± 0	0.02 ± 0.01	nd	0.02 ± 0	0.01 ± 0	0.02 ± 0.01	nd	0.01 ± 0	0.02 ± 0	0.01 ± 0	0.02 ± 0.01	0.01 ± 0	0.01 ± 0.01	0.03 ± 0.01	0.03 ± 0.01	0.02 ± 0.01	0.01 ± 0
ms 129.0916	C7H12O2H+	Ethyl tiglate or Cyclohexanearboxylic acid	0.15 ± 0.04	0.1 ± 0.04	0.03 ± 0.01	0.14 ± 0.04	4.48 ± 1.02	0.03 ± 0.01	0.12 ± 0.02	0.02 ± 0.01	0.02 ± 0	0.01 ± 0.01	0.02 ± 0.02	0.14 ± 0.04	5.02 ± 0.69	0.3 ± 0.08	0.03 ± 0	0.1 ± 0.02	0.11 ± 0.02	0.25 ± 0.02	0.05 ± 0.01	0.14 ± 0.05	0.1 ± 0.01	0.17 ± 0.06	0.01 ± 0.01	0.01 ± 0.01	0.14 ± 0.03	0.02 ± 0.01	0.03 ± 0.01	0.02 ± 0	0.02 ± 0.01	0.21 ± 0.08	0.14 ± 0.05	0.15 ± 0.04	0.03 ± 0.02
ms 129.1287	C8H16OH+	2-Methyl-3-Heptanone, 3-Octanone, 2-octanone, Octanal	0.02 ± 0.02	0.04 ± 0.01	0.11 ± 0.06	0.05 ± 0.02	0.15 ± 0.06	0.09 ± 0.03	0.02 ± 0.01	0.15 ± 0.07	0.4 ± 0.13	0.04 ± 0.03	0.37 ± 0.03	0.02 ± 0.02	0.11 ± 0.01	0.15 ± 0.04	0.11 ± 0.02	0.02 ± 0.01	0.05 ± 0.03	0.06 ± 0.03	0.11 ± 0.04	0.02 ± 0.01	0.06 ± 0.03	0.06 ± 0.06	0.08 ± 0.04	0.03 ± 0.02	0.05 ± 0.03	0.01 ± 0.01	0.12 ± 0.03	0.06 ± 0.03	0.06 ± 0.03	0.03 ± 0.02	0.07 ± 0.04	0.02 ± 0.01	0.08 ± 0.08
ms 131.0613			0.81 ± 0.28	0.17 ± 0.09	0.01 ± 0.01	0.49 ± 0.15	nd	0.01 ± 0	0.46 ± 0.1	0.02 ± 0.01	0.02 ± 0.01	nd	0.01 ± 0	0.68 ± 0.13	0.61 ± 0.09	1.07 ± 0.52	0.01 ± 0	0.3 ± 0.06	0.63 ± 0.22	0.91 ± 0.17	0.01 ± 0.01	0.68 ± 0.22	0.16 ± 0.03	0.91 ± 0.47	0.01 ± 0.01	nd	0.58 ± 0.24	nd	0.03 ± 0	0.01 ± 0.01	0.01 ± 0	2.17 ± 1.08	1.13 ± 0.55	0.53 ± 0.18	0.01 ± 0.01
ms 131.107	C7H14O2H+	Isopropyl butanoate, ethyl isovalerate, isoamyl acetate, amyl acetate, hexanoic acid methyl ester, ethyl tiglate or Cyclohexanearboxylic acid	0.28 ± 0.09	0.18 ± 0.05	0.04 ± 0.03	0.21 ± 0.1	11.59 ± 1.66	0.1 ± 0.01	0.18 ± 0.06	0.05 ± 0.02	0.02 ± 0.01	0.02 ± 0.02	0.02 ± 0.01	0.28 ± 0.07	9.82 ± 2.15	0.82 ± 0.22	0.07 ± 0.03	0.1 ± 0.01	0.34 ± 0.11	0.43 ± 0.03	0.29 ± 0.1	0.34 ± 0.09	0.18 ± 0.03	0.31 ± 0.15	0.02 ± 0.02	0.04 ± 0.04	0.24 ± 0.05	0.03 ± 0.01	0.11 ± 0	0.06 ± 0.04	0.04 ± 0.02	0.97 ± 0.37	0.57 ± 0.28	0.65 ± 0.12	0.05 ± 0.05
ms 135.065			0.02 ± 0.02	nd	nd	nd	nd	nd	nd	nd	nd	0.03 ± 0.02	nd	nd	0.01 ± 0.01	0.01 ± 0.01	nd	nd	0.01 ± 0.01	0.01 ± 0.01	nd	nd	nd	0.03 ± 0.03	nd	nd	0.02 ± 0.02	nd	nd	nd	0.05 ± 0.04	0.25 ± 0.14	0.12 ± 0.02	0.03 ± 0.01	0.05 ± 0.02
ms 135.1091			0.88 ± 0.19	0.56 ± 0.12	0.18 ± 0.1	0.72 ± 0.3	nd	0.31 ± 0.05	0.5 ± 0.19	0.21 ± 0.11	0.17 ± 0.11	0.11 ± 0.1	0.18 ± 0.07	0.8 ± 0.15	1.03 ± 0.11	1.37 ± 0.37	0.17 ± 0.09	0.47 ± 0.08	1.1 ± 0.19	1.29 ± 0.18	0.17 ± 0.09	0.77 ± 0.23	0.6 ± 0.13	1.03 ± 0.24	0.08 ± 0.08	0.1 ± 0.1	0.75 ± 0.11	0.01 ± 0.01	0.4 ± 0.03	0.17 ± 0.1	0.24 ± 0.12	4.25 ± 1.53	2.63 ± 0.88	0.62 ± 0.15	0.2 ± 0.2
ms 136.0785			0.01 ± 0.01	0.01 ± 0.01	0.01 ± 0.01	nd	nd	nd	nd	nd	nd	0.02 ± 0	nd	0.01 ± 0.01	nd	nd	nd	nd	0.01 ± 0	0.01 ± 0	nd	0.01 ± 0.01	nd	0.02 ± 0.01	nd	nd	nd	nd	nd	nd	nd	0.08 ± 0.05	0.04 ± 0.01	0.01 ± 0.01	0.01 ± 0.01
ms 136.9927			0.1 ± 0.01	0.14 ± 0.02	0.05 ± 0.02	0.13 ± 0.04	nd	0.07 ± 0.02	0.08 ± 0.04	0.05 ± 0.03	0.04 ± 0.02	0.02 ± 0.02	0.04 ± 0.03	0.12 ± 0.04	0.1 ± 0.01	0.16 ± 0.02	0.03 ± 0.02	0.1 ± 0.03	0.17 ± 0.02	0.13 ± 0.03	0.04 ± 0.02	0.08 ± 0.01	0.14 ± 0.04	0.12 ± 0.02	0.02 ± 0.02	0.02 ± 0.02	0.15 ± 0.05	0.07 ± 0.01	0.15 ± 0	0.13 ± 0.01	0.03 ± 0.02	0.28 ± 0.05	0.24 ± 0.05	0.09 ± 0.02	0.03 ± 0.03
ms 137.0674			nd	0.08 ± 0.01	0.08 ± 0.06	0.02 ± 0.01	nd	0.04 ± 0.03	0.03 ± 0.03	0.03 ± 0.02	0.01 ± 0.01	0.04 ± 0.04	0.05 ± 0.03	0.01 ± 0.01	nd	0.08 ± 0.04	0.2 ± 0.07	nd	0.02 ± 0.02	0.04 ± 0.02	0.03 ± 0.03	nd	0.08 ± 0.01	0.03 ± 0.03	0.02 ± 0.02	0.01 ± 0.01	0.06 ± 0.03	nd	0.06 ± 0.03	0.06 ± 0.02	0.03 ± 0.02	0.13 ± 0.02	0.1 ± 0.05	nd	0.02 ± 0.02
ms 141.0551	C7H8O3H+		0.02 ± 0.01	0.01 ± 0.01	0.01 ± 0.01	0.01 ± 0	nd	nd	0.01 ± 0	nd	0.01 ± 0.01	0.01 ± 0	nd	0.01 ± 0	0.02 ± 0	0.02 ± 0	0.01 ± 0	nd	0.01 ± 0	0.02 ± 0.01	0.01 ± 0.01	0.01 ± 0.01	0.02 ± 0.01	0.01 ± 0.01	nd	0.01 ± 0.01	0.02 ± 0.01	0.02 ± 0.01	0.01 ± 0	0.01 ± 0	nd	0.03 ± 0	0.04 ± 0	0.61 ± 0.08	0.01 ± 0.01
ms 141.09	C8H12O2H+	Ethyl sorbate	0.03 ± 0.01	0.03 ± 0.01	nd	0.03 ± 0.01	0.04 ± 0.01	nd	0.03 ± 0	nd	nd	nd	nd	0.03 ± 0	0.06 ± 0.01	0.04 ± 0.03	nd	0.02 ± 0	0.03 ± 0	0.03 ± 0.02	nd	0.03 ± 0.01	0.01 ± 0.01	0.04 ± 0.01	nd	nd	0.03 ± 0.01	0.01 ± 0.01	0.01 ± 0.01	nd	nd	0.07 ± 0.04	0.04 ± 0.03	nd	0.01 ± 0.01
ms 141.128	C9H16OH+	2-Nonenal	0.04 ± 0	0.03 ± 0.01	0.08 ± 0.04	0.04 ± 0.02	nd	0.1 ± 0.02	0.03 ± 0.01	0.05 ± 0.01	0.04 ± 0.03	0.02 ± 0.01	0.03 ± 0.01	0.03 ± 0.02	0.15 ± 0.01	0.17 ± 0.02	0.09 ± 0.01	nd	0.06 ± 0.02	0.03 ± 0.01	0.06 ± 0.02	0.05 ± 0.01	0.04 ± 0.02	0.02 ± 0	0.05 ± 0.02	0.02 ± 0.01	0.04 ± 0.02	0.04 ± 0.02	0.08 ± 0.01	0.04 ± 0.02	0.05 ± 0.01	0.07 ± 0.01	0.06 ± 0.03	0.02 ± 0.02	0.04 ± 0.03
ms 141.1637	C10H21+	1-decene	nd	0.01 ± 0.01	0.01 ± 0.01	0.02 ± 0.01	nd	0.02 ± 0	nd	0.02 ± 0.02	0.03 ± 0.03	0.02 ± 0.01	0.01 ± 0	nd	nd	0.02 ± 0.01	0.04 ± 0.03	0.01 ± 0.01	nd	0.03 ± 0.01	0.01 ± 0.01	nd	0.01 ± 0	0.04 ± 0.04	0.01 ± 0.01	0.01 ± 0.01	0.03 ± 0.02	nd	0.05 ± 0.01	0.02 ± 0.01	0.01 ± 0.01	0.02 ± 0.02	0.03 ± 0.01	nd	0.02 ± 0.02
ms 143.0643	C7H10O3H+	2,5-Dimethyl-4-methoxy-3(2H)-furanone	nd	nd	0.01 ± 0	0.01 ± 0	nd	0.01 ± 0	0.01 ± 0	0.01 ± 0	nd	0.01 ± 0	nd	0.01 ± 0	nd	0.02 ± 0.01	0.01 ± 0	0.01 ± 0.01	0.01 ± 0	nd	nd	0.01 ± 0	0.01 ± 0.01	0.01 ± 0	nd	nd	0.01 ± 0	nd	nd	0.02 ± 0.01	nd	0.02 ± 0.01	0.01 ± 0	0.01 ± 0.01	nd
ms 143.1026	C8H14O2H+	cis-3-Hexenyl Acetate*, 2,5-Octanedione*, trans-2-Hexenyl Acetate*, 5- Butyldihydro-2(3 H)-Furanone	0.05 ± 0.02	0.07 ± 0.03	0.01 ± 0.01	0.05 ± 0.01	1.31 ± 0.26	0.03 ± 0.01	0.05 ± 0.02	0.01 ± 0.01	0.01 ± 0	0.02 ± 0.01	0.02 ± 0.01	0.06 ± 0	0.27 ± 0.06	0.08 ± 0.01	0.01 ± 0	0.03 ± 0	0.05 ± 0.02	0.06 ± 0	0.01 ± 0.01	0.03 ± 0.02	0.05 ± 0.01	0.05 ± 0.02	nd	0.01 ± 0.01	0.06 ± 0.01	0.01 ± 0.01	0.04 ± 0	0.02 ± 0.02	0.03 ± 0.01	0.07 ± 0.03	0.05 ± 0.02	0.04 ± 0.01	0.03 ± 0.02
ms 143.1446	C9H18OH+	5-nonanone	nd	0.08 ± 0.06	1 ± 0.2	0.02 ± 0.02	0.02 ± 0.02	0.35 ± 0.09	0.01 ± 0.01	0.19 ± 0.07	0.15 ± 0.08	0.07 ± 0.05	0.13 ± 0.05	0.04 ± 0.04	0.42 ± 0.08	0.48 ± 0.05	0.32 ± 0.03	nd	0.08 ± 0.07	nd	0.81 ± 0.19	0.04 ± 0.02	0.13 ± 0.07	0.01 ± 0.01	0.13 ± 0.06	0.09 ± 0.08	0.04 ± 0.03	nd	0.2 ± 0.03	0.05 ± 0.05	0.15 ± 0.08	0.02 ± 0.02	0.05 ± 0.03	0.01 ± 0.01	0.12 ± 0.12
ms 145.0574			0.04 ± 0	0.02 ± 0.01	nd	0.03 ± 0.01	0.01 ± 0.01	0.01 ± 0	0.02 ± 0	nd	0.01 ± 0	nd	nd	0.03 ± 0.01	0.04 ± 0	0.04 ± 0.01	0.01 ± 0	0.01 ± 0.01	0.04 ± 0.01	0.05 ± 0	0.01 ± 0.01	0.03 ± 0.01	0.02 ± 0	0.03 ± 0	nd	nd	0.02 ± 0	nd	0.02 ± 0	0.01 ± 0.01	nd	0.09 ± 0.04	0.04 ± 0.01	0.02 ± 0.01	nd
ms 145.124	C8H16O2H+	C8 esters and acids (isobutyl butyrate, butanoic acid butyl ester, ethyl hexanoate, hexyl acetate, octanoic acid)	0.06 ± 0.02	0.13 ± 0.05	0.03 ± 0.01	0.15 ± 0.08	5.95 ± 1.63	0.06 ± 0.02	0.07 ± 0.03	nd	0.01 ± 0.01	0.01 ± 0.01	nd	0.08 ± 0.05	0.79 ± 0.24	0.19 ± 0.06	nd	0.06 ± 0.02	0.11 ± 0.04	0.23 ± 0.04	0.05 ± 0.03	0.09 ± 0.02	0.16 ± 0.04	0.14 ± 0.07	nd	0.02 ± 0.02	0.12 ± 0.02	0.06 ± 0.03	0.16 ± 0	0.12 ± 0.04	0.07 ± 0.02	0.25 ± 0.06	0.24 ± 0.08	0.17 ± 0.01	0.06 ± 0.06
ms 147.0567			0.01 ± 0.01	nd	nd	0.01 ± 0	nd	nd	nd	nd	nd	nd	nd	0.01 ± 0.01	0.01 ± 0	0.01 ± 0	nd	nd	0.01 ± 0	0.01 ± 0	nd	0.01 ± 0	0.01 ± 0	0.01 ± 0	nd	nd	nd	0.01 ± 0	nd	nd	nd	0.03 ± 0.01	0.02 ± 0	0.02 ± 0.01	nd
ms 147.116	C11H15+		0.02 ± 0.01	0.04 ± 0.03	0.01 ± 0.01	0.03 ± 0.02	0.03 ± 0.02	0.01 ± 0.01	0.01 ± 0.01	0.01 ± 0.01	0.01 ± 0.01	0.01 ± 0	0.02 ± 0	0.02 ± 0.01	0.03 ± 0.01	0.05 ± 0.02	0.02 ± 0.01	0.03 ± 0.01	0.03 ± 0.01	0.05 ± 0.01	0.01 ± 0.01	0.02 ± 0.01	0.06 ± 0.01	0.04 ± 0.01	0.01 ± 0.01	nd	0.04 ± 0.01	nd	0.02 ± 0	0.02 ± 0.01	0.01 ± 0	0.02 ± 0.01	0.04 ± 0.01	0.05 ± 0.02	0.01 ± 0.01
ms 151.076	C9H10O2H+		0.01 ± 0	0.47 ± 0.05	0.31 ± 0.04	0.09 ± 0.02	0.01 ± 0.01	nd	0.01 ± 0.01	nd	0.33 ± 0.05	0.27 ± 0.02	0.03 ± 0.01	0.04 ± 0.02	0.05 ± 0.01	0.07 ± 0.04	nd	nd	0.31 ± 0.04	0.3 ± 0	nd	0.01 ± 0.01	0.52 ± 0.02	0.7 ± 0.11	0.03 ± 0.01	nd	nd	0.03 ± 0.01	0.05 ± 0	0.18 ± 0.01	0.07 ± 0.01	0.14 ± 0.02	0.19 ± 0.03	0.15 ± 0.02	0.01 ± 0
ms 151.111	C10H14OH+		0.03 ± 0.01	0.08 ± 0.03	nd	0.06 ± 0.01	0.01 ± 0.01	0.04 ± 0	0.03 ± 0.01	0.02 ± 0.01	0.02 ± 0.01	0.03 ± 0.01	0.02 ± 0	0.05 ± 0.02	0.05 ± 0.02	0.09 ± 0.01	0.03 ± 0.01	0.05 ± 0.04	0.06 ± 0.03	0.12 ± 0.03	0.02 ± 0.02	0.04 ± 0.01	0.07 ± 0.03	0.05 ± 0.03	0.02 ± 0.01	0.02 ± 0.02	0.1 ± 0.05	0.01 ± 0.01	0.08 ± 0.01	0.05 ± 0	0.03 ± 0.02	0.09 ± 0.03	0.07 ± 0.05	0.03 ± 0.02	0.01 ± 0.01
ms 155.1771	C11H23+	Undecanol	nd	0.01 ± 0	0.27 ± 0.15	0.06 ± 0.04	0.01 ± 0	0.25 ± 0.06	nd	0.49 ± 0.18	0.06 ± 0.06	0.01 ± 0.01	0.02 ± 0.02	nd	nd	0.03 ± 0.02	0.99 ± 0.29	nd	nd	0.03 ± 0.01	nd	nd	nd	0.11 ± 0.11	0.35 ± 0.26	nd	0.03 ± 0.02	nd	0.09 ± 0.09	nd	0.02 ± 0.01	nd	nd	nd	0.02 ± 0.02
ms 157.122	C9H16O2H+	γ-Nonalactone	0.03 ± 0	0.03 ± 0.01	0.02 ± 0.01	0.03 ± 0.01	0.21 ± 0.03	0.01 ± 0.01	nd	0.02 ± 0	0.01 ± 0	0.01 ± 0	0.01 ± 0.01	0.01 ± 0.01	0.05 ± 0.01	0.05 ± 0.01	0.02 ± 0	0.02 ± 0.01	0.01 ± 0	0.02 ± 0	0.02 ± 0	0.02 ± 0	0.04 ± 0.01	0.02 ± 0	0.01 ± 0.01	nd	0.01 ± 0	0.01 ± 0	0.01 ± 0.01	0.01 ± 0.01	0.01 ± 0	0.03 ± 0	0.04 ± 0.01	0.01 ± 0	0.02 ± 0.01
ms 159.073			0.06 ± 0.02	0.03 ± 0.02	0.01 ± 0	0.05 ± 0.02	nd	0.01 ± 0.01	0.05 ± 0.01	0.01 ± 0.01	0.01 ± 0.01	0.01 ± 0.01	0.01 ± 0	0.05 ± 0.01	0.08 ± 0.02	0.09 ± 0.05	0.01 ± 0.01	0.03 ± 0.01	0.06 ± 0.03	0.09 ± 0.02	0.01 ± 0.01	0.05 ± 0.02	0.01 ± 0.01	0.07 ± 0.04	nd	nd	0.05 ± 0.02	nd	nd	0.01 ± 0.01	nd	0.19 ± 0.1	0.08 ± 0.06	0.04 ± 0.02	nd
ms 159.1285	C9H18O2H+	Hexanoic acid methyl-ethyl ester, butyl isovalerate, isoamyl butyrate, octanoic acid methyl ester, nonanoic acid	0.17 ± 0.06	0.04 ± 0.02	nd	0.13 ± 0.05	0.63 ± 0.18	0.05 ± 0.01	0.1 ± 0.03	0.02 ± 0.01	0.03 ± 0.03	0.01 ± 0.01	0.04 ± 0.01	0.15 ± 0.03	0.25 ± 0.05	0.26 ± 0.1	0.02 ± 0.01	0.09 ± 0.01	0.12 ± 0.03	0.21 ± 0.01	0.04 ± 0.01	0.15 ± 0.04	0.06 ± 0.01	0.21 ± 0.07	0.02 ± 0.02	0.01 ± 0.01	0.16 ± 0.03	0.04 ± 0.02	0.12 ± 0.01	0.08 ± 0.04	0.04 ± 0.02	0.34 ± 0.12	0.23 ± 0.1	0.05 ± 0.02	0.03 ± 0.03
ms 160.9898			0.02 ± 0	0.01 ± 0.01	nd	0.02 ± 0	nd	nd	0.02 ± 0	nd	nd	nd	nd	0.03 ± 0.01	0.03 ± 0	0.02 ± 0.01	nd	0.01 ± 0	0.01 ± 0.01	0.02 ± 0	nd	0.03 ± 0.01	nd	0.03 ± 0	nd	nd	0.02 ± 0.01	nd	nd	0.01 ± 0	nd	0.02 ± 0.01	0.02 ± 0	0.05 ± 0.01	nd
ms 163.077	C10H10O2H+		0.06 ± 0.01	0.14 ± 0.06	0.01 ± 0	0.01 ± 0	nd	nd	nd	nd	nd	nd	nd	0.05 ± 0.01	0.05 ± 0	0.01 ± 0	nd	0.01 ± 0.01	0.06 ± 0.01	0.02 ± 0	nd	nd	0.15 ± 0.04	0.02 ± 0	nd	nd	nd	0.04 ± 0.01	0.07 ± 0.01	0.05 ± 0.01	nd	0.12 ± 0.04	0.1 ± 0.02	0.05 ± 0.01	0.01 ± 0
ms 163.1386			0.05 ± 0.01	0.04 ± 0.01	0.01 ± 0.01	0.06 ± 0.02	0.03 ± 0.01	0.02 ± 0	0.05 ± 0.02	0.01 ± 0	0.01 ± 0.01	0.01 ± 0	0.01 ± 0	0.05 ± 0.01	0.05 ± 0.01	0.08 ± 0.03	0.01 ± 0.01	0.06 ± 0	0.03 ± 0.01	0.13 ± 0.02	0.02 ± 0	0.06 ± 0.02	0.05 ± 0.02	0.09 ± 0.02	0.01 ± 0	0.01 ± 0.01	0.06 ± 0.02	0.02 ± 0.01	0.03 ± 0	0.03 ± 0.01	0.02 ± 0	0.04 ± 0.02	0.03 ± 0.02	0.05 ± 0.01	0.02 ± 0.01
ms 167.0587			0.05 ± 0	0.02 ± 0.01	0.01 ± 0	0.04 ± 0.02	nd	0.01 ± 0.01	0.03 ± 0.01	nd	0.02 ± 0.01	nd	0.01 ± 0	0.05 ± 0.01	0.03 ± 0	0.04 ± 0.02	0.01 ± 0.01	0.01 ± 0	0.04 ± 0.01	0.03 ± 0.02	0.03 ± 0.01	0.05 ± 0.01	0.03 ± 0.01	0.08 ± 0.02	0.01 ± 0	0.01 ± 0	0.03 ± 0.01	0.01 ± 0.01	0.02 ± 0.01	0.02 ± 0.02	0.01 ± 0.01	0.07 ± 0.05	0.03 ± 0.02	0.02 ± 0.01	0.02 ± 0.02
ms 167.1418	C11H18OH+		nd	nd	0.03 ± 0.01	0.02 ± 0.01	0.01 ± 0	0.02 ± 0.01	0.01 ± 0.01	0.01 ± 0.01	0.01 ± 0	nd	0.01 ± 0	0.01 ± 0.01	0.07 ± 0	0.06 ± 0.01	0.03 ± 0.01	nd	0.02 ± 0.01	0.02 ± 0.01	0.02 ± 0.01	0.01 ± 0.01	0.01 ± 0.01	0.01 ± 0.01	0.02 ± 0.01	0.01 ± 0.01	0.01 ± 0.01	0.01 ± 0	0.02 ± 0	0.01 ± 0	nd	0.03 ± 0.01	0.03 ± 0.01	0.01 ± 0	0.01 ± 0.01
ms 169.143	C12H25+	Dodecanol	0.03 ± 0.01	0.03 ± 0.01	0.14 ± 0.02	0.04 ± 0.01	0.06 ± 0.01	0.04 ± 0.02	0.03 ± 0.01	0.05 ± 0	0.01 ± 0	0.01 ± 0.01	0.02 ± 0.01	0.02 ± 0	0.11 ± 0.02	0.07 ± 0.01	0.08 ± 0.01	0.02 ± 0	0.04 ± 0.01	0.03 ± 0.01	0.02 ± 0.01	0.02 ± 0	0.02 ± 0	0.04 ± 0.01	0.06 ± 0.01	0.02 ± 0.01	0.03 ± 0.01	0.02 ± 0	0.02 ± 0.01	0.02 ± 0	0.01 ± 0.01	0.04 ± 0.01	0.04 ± 0.01	0.02 ± 0.01	0.02 ± 0.01
ms 171.1172	C10H18O2H+	Linalool oxide A, Linalool oxide B, 2-Octenyl Acetate, gamma-Decalactone	0.01 ± 0.01	0.01 ± 0	nd	0.01 ± 0.01	0.31 ± 0.08	nd	0.02 ± 0	0.01 ± 0	nd	nd	nd	0.01 ± 0	0.05 ± 0.01	0.03 ± 0	nd	nd	0.01 ± 0	0.01 ± 0.01	nd	0.01 ± 0.01	nd	0.03 ± 0.02	0.01 ± 0	nd	0.01 ± 0.01	0.01 ± 0	nd	0.01 ± 0.01	nd	0.04 ± 0.01	0.02 ± 0.01	0.01 ± 0.01	nd
ms 173.1386	C10H20O2H+	Hexanoic acid butyl ester, butanoic acid hexyl ester, octanoic acid ethyl ester, acetic acid octyl ester, decanoic acid	0.08 ± 0.02	0.31 ± 0.03	0.14 ± 0.07	0.18 ± 0.1	0.61 ± 0.25	0.29 ± 0.02	0.13 ± 0.07	0.18 ± 0.06	0.14 ± 0.08	0.1 ± 0.05	0.24 ± 0.01	0.09 ± 0.06	0.22 ± 0.09	0.39 ± 0.11	0.21 ± 0.06	0.16 ± 0.09	0.26 ± 0.08	0.33 ± 0.1	0.17 ± 0.06	0.09 ± 0.04	0.29 ± 0.15	0.19 ± 0.12	0.16 ± 0.03	0.09 ± 0.07	0.23 ± 0.12	0.17 ± 0.09	0.37 ± 0.03	0.15 ± 0.1	0.14 ± 0.09	0.7 ± 0.2	0.9 ± 0.14	0.15 ± 0.09	0.15 ± 0.09
ms 179.1721			0.01 ± 0	0.01 ± 0.01	0.01 ± 0	0.04 ± 0.02	nd	0.03 ± 0.01	0.02 ± 0.01	0.02 ± 0.01	0.01 ± 0.01	0.01 ± 0	0.01 ± 0	0.02 ± 0.01	0.03 ± 0.01	0.08 ± 0.02	0.03 ± 0.01	0.01 ± 0.01	0.04 ± 0.02	0.05 ± 0.01	0.02 ± 0	0.02 ± 0	0.03 ± 0.02	0.05 ± 0.02	0.01 ± 0.01	0.01 ± 0	0.03 ± 0.02	0.01 ± 0	0.02 ± 0.01	0.01 ± 0.01	0.01 ± 0.01	0.04 ± 0.01	0.05 ± 0.04	0.03 ± 0.01	0.02 ± 0.01
ms 185.1493			0.01 ± 0.01	0.02 ± 0.01	0.01 ± 0	0.01 ± 0	0.02 ± 0.01	nd	nd	0.01 ± 0	0.01 ± 0.01	nd	0.01 ± 0	0.01 ± 0	0.02 ± 0.01	0.01 ± 0.01	0.02 ± 0	0.02 ± 0.01	0.02 ± 0.01	0.01 ± 0	nd	0.02 ± 0	0.03 ± 0.01	0.02 ± 0.01	nd	nd	0.01 ± 0.01	0.02 ± 0	0.01 ± 0	0.01 ± 0	nd	0.02 ± 0.01	0.02 ± 0	0.01 ± 0	nd
ms 187.163			nd	0.01 ± 0	nd	nd	0.02 ± 0	nd	nd	0.01 ± 0	nd	nd	0.01 ± 0	0.01 ± 0	0.01 ± 0	0.01 ± 0	nd	nd	0.01 ± 0	0.02 ± 0.01	0.01 ± 0.01	0.01 ± 0	0.01 ± 0	0.01 ± 0.01	nd	nd	0.01 ± 0.01	0.01 ± 0.01	0.01 ± 0	0.01 ± 0	nd	0.03 ± 0.01	0.02 ± 0.01	nd	nd
ms 197.1875	C13H24OH+		0.03 ± 0.01	0.02 ± 0.01	0.03 ± 0.01	0.03 ± 0.01	0.03 ± 0.01	0.07 ± 0.01	0.02 ± 0.01	0.04 ± 0	0.03 ± 0.02	0.01 ± 0	nd	0.02 ± 0.01	0.05 ± 0	0.06 ± 0.01	0.06 ± 0.02	0.02 ± 0	0.02 ± 0.01	0.03 ± 0.01	0.02 ± 0.01	0.03 ± 0.01	0.02 ± 0.01	0.03 ± 0.01	0.01 ± 0.01	0.01 ± 0	0.02 ± 0.01	0.01 ± 0	0.01 ± 0.01	0.02 ± 0.01	nd	0.04 ± 0.01	0.03 ± 0.01	0.02 ± 0.01	0.01 ± 0.01
ms 199.207	C13H26OH+		0.02 ± 0.01	0.01 ± 0	0.01 ± 0	0.01 ± 0	0.01 ± 0	0.02 ± 0	0.01 ± 0	0.01 ± 0	0.01 ± 0.01	nd	0.01 ± 0	0.02 ± 0.01	0.02 ± 0.01	0.04 ± 0	0.02 ± 0	0.01 ± 0	0.01 ± 0.01	0.02 ± 0.01	0.06 ± 0.03	0.02 ± 0	0.02 ± 0.01	0.02 ± 0	nd	0.01 ± 0.01	0.01 ± 0	0.01 ± 0	0.01 ± 0.01	0.01 ± 0	nd	0.02 ± 0	0.02 ± 0	0.01 ± 0	0.01 ± 0

## Sheet: in silico fruit loadings PCA
Loadings	X.PC1	X.PC2	X.PC3
ms75.044	-0.105267529054884	-0.0248192820789395	-0.117459569164562
ms103.07	-0.0989871577015744	-0.00851593988092086	-0.00307588954306388
ms101.0605	-0.0988038281068264	0.00973454347750622	0.0852477310145948
ms27.024	-0.100364057590272	-0.02284791246522	-0.035682249236005
ms33.033	-0.193272913855378	-0.38100957748999	0.344086819818106
ms47.0491	-0.100193921083895	-0.0230677344641163	-0.0708965794232039
ms57.07	-0.108953327270768	-0.025128001803065	-0.187783633387363
ms123.0777	-0.0634159303866147	0.0498024811196382	0.00974438783757616
ms95.0506	-0.120889441931086	0.0475401516357861	-0.0427996278604447
ms109.0680	-0.0793096633364287	-0.0236761183535754	-0.0236787442212141
ms111.0445	-0.0508791708134818	-0.0484852319041405	-0.142716274811262
ms28.0308	-0.0922149457262063	0.00459204356527591	-0.0267563027612331
ms31.0180	-0.107153008637501	-0.0457618047530378	-0.102132099754173
ms45.033	-0.0919166858193196	-0.0588030611123189	0.0827601795099687
ms57.034	-0.0982670984432053	-0.107698284020878	-0.528901157653526
ms87.08	-0.144831781257413	-0.062220464498694	0.113207310847902
ms97.0274	-0.190215817531843	-0.442048142413254	0.165251163130157
ms141.128	-0.0811466506701077	0.0350802207579615	-0.000376042628021726
ms141.1637	-0.0266524779803575	0.0489695085410823	0.0165452628340818
ms39.023	-0.108655177681802	-0.0208893708636385	-0.0608842154539603
ms85.101	-0.117921777304964	0.242962436966593	0.00807118368262048
ms71.085	-0.106949910542291	-0.0218045237099432	-0.109540380429453
ms43.054	-0.106561851245174	-0.0320764678047605	-0.0132602607569869
ms91.073	-0.0999188677820542	-0.0648953568393377	0.0053078558032337
ms89.0595	-0.107309856724723	-0.037235535134616	0.0373473673851675
ms105.0397	-0.0585374970666363	0.000810235559390997	-0.0190974861676352
ms145.124	-0.0921784971193991	0.0790702740569119	0.133284513640897
ms129.0916	-0.102926370765578	0.0234290537897961	0.0971794746637406
ms59.049	-0.174782478280215	-0.148458703630701	-0.168126281193975
ms85.065	-0.0977344813236403	-0.0759416518766166	0.0449474557678302
ms143.1446	-0.111381289039676	0.120274040230024	0.0271134951129304
ms121.0611	-0.109691426196117	-0.0305175316790136	0.0476522911557712
ms71.049	-0.107226256054217	-0.0395460455986252	0.0456327611917701
ms99.08	-0.117312976697697	0.147440903593269	-0.0331338805143431
ms87.044	-0.102860646053267	-0.0558855713594533	0.100662322619033
ms34.9953	-0.0758101722745155	-0.0163935931813471	0.179326038316089
ms49.0107	-0.0987636734182122	0.0295142865627686	0.0296617314783646
ms63.027	-0.132382017579734	0.117946311837004	0.016694503185042
ms74.006	-0.0456123701649139	-0.0748690885346786	-0.030183212190254
ms77.043	-0.12528774078074	0.0529906057375871	0.00235489036030262
ms79.0195	-0.0996434786351334	0.0362733266336604	0.0719365927673498
ms95.0161	-0.114858964689523	0.112151252782822	-0.00594823511122143
ms28.018	-0.108821325312929	0.0510854856251065	-0.00325690881652626
ms31.0362	-0.0603607519937821	-0.0402256955690932	-0.0691791628170966
ms41.038	-0.108160342796092	-0.0259052439230717	-0.057527019803523
ms42.0112	-0.0948242883505011	-0.0354386065998523	0.00295126014364825
ms43.017	-0.111906380091911	-0.047474462490494	0.0360767116181546
ms53.0043	-0.0756225178525985	-0.0123676911644714	-0.0286433494424869
ms53.04	-0.109682091473051	-0.0388011207400289	0.0671031972216571
ms62.0216	-0.179202609406483	0.105218637791166	-0.0240710926125275
ms67.0219	-0.110960946736337	0.0975698034886383	0.0564136801424167
ms67.0587	-0.123787675081817	0.0656494088149803	-0.00836422609371773
ms69.033	-0.149564768964505	0.340580705161812	0.0688712591779119
ms73.0239	-0.102390181425927	-0.0487645703946693	-0.0406594682820956
ms75.0782	-0.0933155812443169	-0.0735592058418615	-0.151810852568936
ms77.06	-0.104372063386612	-0.133423940285058	-0.0785933115554732
ms78.967	-0.096959081914851	0.0251402317509271	-0.100153642026263
ms79.0721	-0.0996780865591406	-0.0364954401066312	-0.0785359981809994
ms81.03	-0.116942491171608	0.0346296128247583	-0.0250865078446478
ms85.0324	-0.071735628288862	-0.00109207844006007	-0.0423745672494322
ms91.0170	-0.0784490906493907	0.01634572050474	-0.067843001290793
ms91.0572	-0.102394160464608	-0.0223136762057505	0.0151648837908178
ms94.9952	-0.101189112448652	-0.00722116079367946	-0.15298734810013
ms95.9517	-0.0310298637404657	0.0262569146213743	0.0328511306555107
ms97.101	-0.134684112587641	0.387654342471731	0.0931638646013537
ms101.0247	-0.0493742561081694	-0.0190758693556182	-0.0411456442225489
ms103.0477	-0.0892573900447747	-0.0160230295956415	-0.145405699254695
ms105.0725	-0.110461537332632	0.0406463799916475	-0.0755194403609923
ms107.0349	-0.200658327618841	0.0933869080245151	0.00913221399190767
ms108.9584	-0.0641729151350318	-0.00705489259801557	0.0430428444781143
ms113.0844	-0.0689502708440563	0.0177456848705685	-0.0409202453839994
ms115.0373	-0.0296448791966001	-0.055969370954367	-0.0223838349852582
ms115.07	-0.0936787212235685	-0.00789545081916027	0.0305229120414666
ms115.11	-0.105257032833251	0.0504168359849713	-0.0384759852223127
ms117.0463	-0.0578907164616131	-0.101056359403981	-0.24360925163199
ms117.0917	-0.102714975613806	-0.00908480465251937	0.0418188543548108
ms119.0334	-0.0226422539737595	-0.0126577566032186	0.0052305447159921
ms121.9707	-0.0381516289991305	-0.0280436583783105	-0.0443084888292662
ms123.9462	-0.0824417194583539	0.00354017224714987	0.0189646778341654
ms125.0551	-0.0118583966048325	-0.0139217950660021	-0.0377103212068369
ms127.0370	-0.0503885600152362	-0.0481617193664886	0.00112070966986255
ms127.0704	-0.028249203332412	0.0301412431576712	0.036369899715148
ms129.0552	-0.0377646837066115	0.00627123775685526	-0.102916625093997
ms129.1287	-0.0848070906148689	0.0749084935119596	-0.0298212861919771
ms131.0613	-0.0926103323322945	-0.101187767033393	-0.0207248819521099
ms131.107	-0.104078834014275	0.0478466216802125	0.148679460270837
ms135.0650	-0.0582647980485094	-0.0464337753598197	0.188966072169646
ms135.1091	-0.114403143158447	-0.000301271399511554	0.00288532261249709
ms136.0785	-0.0106064430237614	-0.0267676696445225	-0.00650149239626734
ms136.9927	-0.0729843267007766	0.0375564242061493	-0.0178859171594929
ms137.0674	-0.0480911910961409	0.102603583918473	-0.0616260010281768
ms141.0551	-0.0278647360559311	0.0073181308510242	0.00290477067036571
ms141.0900	-0.0395300738338374	-0.0242115907952346	0.0366081533092399
ms143.0643	-0.0119416977846981	0.00815672896842467	-0.00123142341696425
ms143.1026	-0.0790203930053016	0.0343660623526641	0.0866884472548003
ms145.0574	-0.0313387746763186	-0.017541246539634	-0.00823151020497648
ms147.0567	-0.0109181585426537	-0.000584155462365208	-0.00900568775852731
ms147.1160	-0.0394232027065083	0.00641233605453136	0.0156936758200737
ms151.0760	-0.109007955421048	-0.00070889981538455	-0.00363517938934889
ms151.111	-0.060748394126577	0.0554805884342742	0.103744434395608
ms155.1771	-0.0514523024608698	0.121825339023829	-0.0723107146368922
ms157.122	-0.0415039426592695	0.00855938689827778	0.00698703400311942
ms159.0730	-0.0457734086786421	-0.0729290236825728	0.0292258394648666
ms159.1285	-0.0872871787794023	0.00346493261074834	0.0677830438421269
ms160.9898	-0.0224321211453606	0.00129405362554135	0.00856179941364708
ms163.0770	-0.0365520098669854	-0.000703700215416849	-0.0103611724722042
ms163.1386	-0.0569978590932938	-0.0116994863548576	0.0113284993849471
ms167.0587	-0.0420436517198877	-0.0582646801452988	0.0289095816243004
ms167.1418	-0.0398113804542835	0.00609769483461611	0.00521016079670128
ms169.1430	-0.0597103938446663	0.0340873059902267	0.0438019771983867
ms171.1172	-0.0312725407538053	-0.00444180189481351	0.0371293284393059
ms173.1386	-0.105377217240515	0.124870120352285	0.0525147726993091
ms179.1721	-0.0419805763125995	0.0344714838718018	-0.00271243141203934
ms185.1493	-0.020176326986341	-0.0226661007888673	0.0345679836974973
ms187.1630	-0.00908977658147403	0.000823150498058981	-0.00902502823657606
ms197.1875	-0.0399709056188557	0.0153280505587122	-0.00702791956037625
ms199.2070	-0.0220528584766327	-0.0129708810664018	0.0413657774868626
